# Supplementary material
Source: publisher figshare collection journal article supplement (https://gsajournals.figshare.com/ndownloader/files/13669541)
Supplement: Supplementary file 1 [file 13669541]

## Sheet: Extreme Windows
chrom	win	mid_pos	dzA	dzB	dzC	score	Significant by permuations??
Scf_3R	1846	16964006	7.50586	7.26114	7.28588	22.0529	Sig
Scf_2R	559	6634507	6.21742	5.83916	8.36453	20.4211	Sig
Scf_2R	278	3195081	-6.5971	-4.71633	-7.62438	18.9378	Sig
Scf_2R	1236	12943530	6.34801	5.92435	5.61716	17.8895	Sig
Scf_X	216	3860169	-4.84388	-5.523	-6.33638	16.7033	Sig
Scf_X	1316	16285700	-2.55003	-6.78411	-7.0809	16.415	Sig
Scf_2L	379	3862348	5.07885	5.37887	5.93124	16.389	Sig
Scf_3R	1720	15966015	4.90001	7.3814	4.00644	16.2879	Sig
Scf_X	704	9051668	-4.63869	-5.91305	-5.57769	16.1294	Sig
Scf_X	1302	16095278	-3.96907	-6.19086	-5.72158	15.8815	Sig
Scf_2L	2265	22372358	-5.1063	-5.11279	-5.50534	15.7244	Sig
Scf_3L	2707	23410425	-4.46654	-5.33267	-5.82348	15.6227	Sig
Scf_2L	2035	19557931	-5.34024	-5.57223	-4.69238	15.6048	Sig
Scf_X	161	3095919	-6.23254	-5.12717	-4.18633	15.546	Sig
Scf_3L	2706	23400233	-5.28207	-3.89873	-6.34334	15.5241	Sig
Scf_3R	2441	22610033	5.86337	3.49566	6.16212	15.5211	Sig
Scf_3R	1269	11766194	-3.07111	-6.99571	-5.35888	15.4257	Sig
Scf_2R	85	851627	-6.62896	-3.69907	-4.97113	15.2992	Sig
Scf_3L	2729	23736052	-4.59548	-4.91783	-5.66591	15.1792	Sig
Scf_3L	1121	9206907	3.80021	5.83536	5.52407	15.1596	Sig
Scf_X	1225	15003546	-5.37229	-4.78601	-4.98689	15.1452	Sig
Scf_X	250	4278365	-5.32311	-5.44091	-4.29178	15.0558
Scf_3L	689	6027344	-6.03186	-4.18945	-4.77821	14.9995
Scf_X	29	823056	-6.32541	-4.34212	-4.28106	14.9486
Scf_X	4	8845	-5.41645	-3.80313	-5.64573	14.8653
Scf_2L	2240	22110366	-4.71299	-4.7929	-5.24098	14.7469
Scf_X	1672	20556050	-4.30929	-5.28539	-5.07611	14.6708
Scf_X	1317	16291234	4.07541	5.72856	4.82661	14.6306
Scf_2L	2146	20794953	-4.99011	-4.49822	-5.08769	14.576
Scf_2L	2162	20925006	-5.03261	-4.65265	-4.85901	14.5443
Scf_2R	279	3197790	-4.99267	-4.59975	-4.91268	14.5051
Scf_X	1566	19624131	-4.47281	-4.38228	-5.60412	14.4592
Scf_3L	472	4214139	-4.14928	-4.53832	-5.6884	14.376
Scf_2L	2234	22071377	-3.53471	-4.48216	-6.34862	14.3655
Scf_2L	390	3921432	4.11976	4.20993	6.00891	14.3386
Scf_3L	2730	23757336	-4.45047	-4.71317	-5.15652	14.3202
Scf_X	1410	17395033	-3.84718	-5.15171	-5.31284	14.3117
Scf_3L	1393	11278359	4.09601	4.81617	5.33113	14.2433
Scf_X	249	4264079	-5.03134	-5.28163	-3.8331	14.1461
Scf_2L	2221	21754733	-4.20313	-5.01152	-4.9151	14.1297
Scf_2L	1468	13894900	-5.75254	-5.81995	-2.48074	14.0532
Scf_2R	163	1843195	-4.00625	-4.03491	-5.99163	14.0328
Scf_2R	149	1676056	-3.84337	-5.17165	-5.01759	14.0326
Scf_2R	160	1775562	3.81481	4.57761	-5.61923	14.0116
Scf_3R	2487	23078485	-4.70305	-4.43263	-4.87114	14.0068
Scf_X	1149	13841803	-5.89117	-3.6707	-4.42564	13.9875
Scf_2L	2216	21706675	-3.52312	-3.82247	-6.64071	13.9863
Scf_2L	2170	21055120	-4.8634	-3.80832	-5.27102	13.9427
Scf_2R	169	1915102	-5.15673	-4.21636	-4.50124	13.8743
Scf_X	1686	20748103	-3.94643	-4.89898	-4.96648	13.8119
Scf_2L	2254	22181717	-5.06649	-4.4656	-4.26366	13.7958
Scf_2R	218	2450107	-4.5972	-4.71221	-4.46883	13.7782
Scf_X	1217	14705870	4.61686	5.30977	-3.8234	13.75
Scf_2R	228	2572215	-6.00893	-3.00028	-4.71385	13.7231
Scf_2L	2205	21558792	-4.64967	-4.76735	-4.17209	13.5891
Scf_2R	280	3205249	-5.15625	3.40534	4.95209	13.5137
Scf_X	130	2818064	3.01653	5.46593	5.01932	13.5018
Scf_2R	122	1356982	-4.20933	-5.43613	-3.85436	13.4998
Scf_2L	2038	19600853	-4.32671	-5.3822	-3.75968	13.4686
Scf_2R	933	10209375	-4.8146	-4.6278	-3.92596	13.3684
Scf_2L	2178	21189173	-4.1723	-4.31346	-4.87053	13.3563
Scf_2R	1288	13365672	-4.51557	-5.27111	-3.47873	13.2654
Scf_2L	2326	23355979	-4.38519	-3.97317	-4.83411	13.1925
Scf_2R	11	119724	-4.3615	-3.6112	-5.14937	13.1221
Scf_2R	20	330659	-3.26195	-3.84403	-5.93834	13.0443
Scf_X	768	9695826	-3.25605	-4.08244	-5.57784	12.9163
Scf_2R	175	1981393	4.44634	4.10384	4.28069	12.8309
Scf_2R	67	751737	-4.17256	-4.66359	-3.91848	12.7546
Scf_3L	2692	23160749	-3.4816	-3.96292	-5.22965	12.6742
Scf_2L	2133	20600783	-3.87693	-4.51308	-4.25464	12.6447
Scf_2R	1476	15245313	-4.11116	-5.00853	-3.52032	12.64
Scf_2L	2260	22330840	-4.17585	-2.84399	-5.61058	12.6304
Scf_X	1673	20583538	-4.28241	-4.49196	-3.84591	12.6203
Scf_2L	2062	19881116	-3.91148	-4.3873	-4.25039	12.5492
Scf_2L	2037	19598567	-4.09871	-4.9153	-3.52624	12.5403
Scf_X	1691	20789284	-3.69774	-3.67457	-5.11071	12.483
Scf_2R	123	1358304	-4.1207	-5.07826	-3.25775	12.4567
Scf_2R	136	1445750	-3.95265	-3.82851	-4.67486	12.456
Scf_X	920	11351402	3.95184	4.01084	4.483	12.4457
Scf_2R	159	1773409	-3.35238	-4.4997	-4.58955	12.4416
Scf_X	1115	13352706	-4.10492	-4.59072	-3.73468	12.4303
Scf_3L	2731	23760723	-3.59921	-4.19556	-4.61805	12.4128
Scf_3L	2752	24056215	-3.71027	-4.08811	-4.59729	12.3957
Scf_2R	174	1974257	-6.04317	-3.37803	-2.94396	12.3652
Scf_X	1114	13315510	-4.05977	-4.41771	-3.88512	12.3626
Scf_2R	68	753031	-3.92491	-4.44799	-3.9729	12.3458
Scf_2R	168	1885043	-4.00031	-3.93067	-4.338	12.269
Scf_2R	99	1089450	-4.46848	-2.67712	-5.12027	12.2659
Scf_3L	944	7866440	3.08934	4.4795	4.68919	12.258
Scf_3R	2071	18981509	-3.49447	-3.64493	-5.11548	12.2549
Scf_2L	1017	9691288	3.80316	3.19142	5.25092	12.2455
Scf_2L	2207	21597489	-2.89818	-5.51108	-3.83229	12.2416
Scf_3L	2718	23585855	-3.42365	-4.30469	-4.51305	12.2414
Scf_2R	312	3454337	-3.60138	-3.22646	-5.41181	12.2397
Scf_2R	213	2400256	3.57011	3.70705	4.94748	12.2246
Scf_2L	2169	21044054	-4.15516	-3.59392	-4.45097	12.2001
Scf_X	581	7871092	4.58438	3.29118	4.28128	12.1568
Scf_2L	2300	22980400	-4.01069	-4.41749	-3.71039	12.1386
Scf_3L	1122	9212318	3.77568	3.4192	4.9369	12.1318
Scf_2L	2192	21425764	-3.79322	-4.02702	-4.28242	12.1027
Scf_X	839	10549434	3.70393	3.42647	4.96525	12.0957
Scf_X	421	6104299	-3.65757	3.12078	-5.29911	12.0775
Scf_2L	2264	22356406	-3.52027	-4.37737	-4.15601	12.0537
Scf_2L	2304	23056860	-3.74217	-3.77706	-4.5293	12.0485
Scf_3R	11	164568	3.39103	-3.74145	-4.90637	12.0388
Scf_3L	2722	23694975	-3.59158	-4.25611	-4.14501	11.9927
Scf_3R	23	363186	-4.24163	-3.96679	-3.77901	11.9874
Scf_3R	1487	14019144	-3.7302	-4.28426	-3.96876	11.9832
Scf_2L	409	4114002	4.00195	4.82113	3.07577	11.8988
Scf_3R	272	3203078	-3.05924	3.75641	-5.08055	11.8962
Scf_X	1623	20258372	-3.74579	-3.38	-4.76914	11.8949
Scf_2L	2328	23369495	-3.05862	-4.90287	-3.88975	11.8512
Scf_X	1596	20025852	-4.3551	3.32093	-4.16201	11.838
Scf_X	1628	20272221	-4.22957	-4.79765	-2.79463	11.8218
Scf_3L	2639	22342786	-2.90815	-5.38183	-3.51669	11.8067
Scf_X	821	10271684	4.61632	4.01317	3.16632	11.7958
Scf_3L	1396	11283139	2.49584	4.83804	4.43812	11.772
Scf_2L	2040	19669525	-3.18049	-4.40491	-4.15824	11.7436
Scf_3L	2670	23030583	-3.14899	-3.28911	-5.3054	11.7435
Scf_X	1627	20272116	-4.6061	-3.73141	-3.39219	11.7297
Scf_2L	2295	22883213	-3.00594	-3.70616	-4.9962	11.7083
Scf_2R	1994	21462450	-2.87897	-4.28393	-4.5357	11.6986
Scf_2R	198	2189691	-3.51768	3.67607	-4.47459	11.6683
Scf_X	1608	20162676	-3.59756	-3.81781	-4.23327	11.6486
Scf_3L	2697	23251592	-4.07899	-3.70466	-3.85832	11.642
Scf_2L	2150	20842479	-3.86334	-3.0109	-4.74603	11.6203
Scf_2L	2193	21438534	3.1906	-4.56751	3.84719	11.6053
Scf_2L	2301	22980535	-3.17846	-4.18783	-4.18382	11.5501
Scf_2R	164	1871806	2.55324	4.40547	4.58903	11.5477
Scf_2L	2041	19672691	-4.03569	-3.55985	-3.942	11.5375
Scf_2R	236	2644298	3.85909	3.55555	4.1115	11.5261
Scf_2R	190	2069983	-4.13486	-3.1038	-4.25454	11.4932
Scf_3L	2417	19791115	-4.03441	-3.25825	-4.17892	11.4716
Scf_2L	2153	20851117	-3.35348	-3.71762	-4.3991	11.4702
Scf_2R	74	769207	-4.02197	-2.62168	-4.75487	11.3985
Scf_2R	144	1599380	-2.81707	-4.20977	-4.34817	11.375
Scf_2R	215	2417249	-3.95092	-3.4231	-3.99661	11.3706
Scf_2R	7	91819	-4.22322	-3.37684	-3.75262	11.3527
Scf_X	1465	18210687	-4.03265	-4.21142	-3.09983	11.3439
Scf_X	1191	14386731	4.07772	-3.62927	-3.63136	11.3384
Scf_3R	2443	22628217	4.07557	3.58631	3.65727	11.3191
Scf_2L	2189	21351479	-3.56609	-4.44353	-3.29379	11.3034
Scf_X	1681	20689346	-3.79235	-3.06616	-4.43035	11.2889
Scf_2R	107	1176743	-3.86583	-2.08364	-5.314	11.2635
Scf_3L	2676	23056726	-2.99145	-4.62486	-3.63389	11.2502
Scf_2R	516	6090466	2.26409	5.36067	3.61154	11.2363
Scf_2L	2144	20769808	-4.16095	-3.14174	-3.92591	11.2286
Scf_2R	73	764429	-3.3871	-4.86204	-2.94837	11.1975
Scf_2R	1173	12406413	4.07558	3.43474	3.67729	11.1876
Scf_2R	78	787937	-3.06239	-4.06393	-3.98763	11.114
Scf_3L	2391	19515650	-3.81539	-3.46826	-3.8269	11.1105
Scf_2R	186	2045433	2.79947	-3.50826	-4.7802	11.0879
Scf_2R	399	4630623	-3.63204	-4.30094	-3.13386	11.0668
Scf_X	187	3381952	-4.45902	-2.82153	-3.77689	11.0574
Scf_X	1685	20746543	-3.47337	-3.17524	-4.40841	11.057
Scf_3R	2148	19633316	3.92721	3.3355	3.75358	11.0163
Scf_3R	1150	10758319	-3.84153	-4.50776	2.65583	11.0051
Scf_2L	2248	22149063	-3.49009	-4.08879	-3.4171	10.996
Scf_X	1633	20300973	-2.77019	-4.17716	-4.04036	10.9877
Scf_3L	2654	22462299	-2.81886	-3.63185	-4.53017	10.9809
Scf_2R	141	1471978	-3.34619	-3.6069	-4.02699	10.9801
Scf_X	2	3521	-3.58117	-3.81556	-3.54524	10.942
Scf_2L	2299	22973147	4.03121	-4.31455	-2.58644	10.9322
Scf_X	431	6232268	3.24175	4.12931	3.5494	10.9205
Scf_2L	2245	22136731	3.10575	3.6844	4.08722	10.8774
Scf_2L	2339	23452971	-3.65662	-3.7857	-3.40707	10.8494
Scf_X	1622	20247218	2.82055	-3.80824	-4.17885	10.8076
Scf_2L	2252	22158510	-3.48944	-3.24206	-4.0131	10.7446
Scf_X	1150	13846606	-3.89642	-4.08852	2.7596	10.7445
Scf_X	5	10078	-4.27366	-2.56269	-3.90149	10.7378
Scf_X	442	6398837	-3.42216	-3.3099	-3.94276	10.6748
Scf_X	1613	20186553	-3.49782	-3.37759	-3.79737	10.6728
Scf_2R	155	1696599	-3.22162	-3.49477	-3.91715	10.6335
Scf_X	1144	13797235	-3.73349	-3.45725	-3.42697	10.6177
Scf_X	868	10776967	-4.00596	-3.13526	-3.46512	10.6063
Scf_2R	457	5344643	2.69047	3.06975	4.84409	10.6043
Scf_2R	199	2198436	-3.24356	-4.92021	-2.43935	10.6031
Scf_2L	1851	17985198	-2.76672	3.59275	4.24353	10.603
Scf_3R	827	8018741	-2.38177	2.75498	5.45954	10.5963
Scf_X	1670	20524069	-4.00227	-2.72873	-3.85299	10.584
Scf_2R	166	1882763	-3.23726	3.20179	-4.13118	10.5702
Scf_X	904	11083830	-4.6811	-3.25303	2.6326	10.5667
Scf_2L	2136	20642963	-5.82362	-2.20171	2.5172	10.5425
Scf_3L	913	7713140	4.92748	3.47644	2.09883	10.5028
Scf_2R	81	800439	-2.70634	-2.83178	-4.96213	10.5002
Scf_2L	2147	20807621	-3.87857	-3.27082	-3.34667	10.4961
Scf_2R	836	9339334	2.35402	-2.68687	5.44226	10.4831
Scf_3R	394	4529163	-3.01478	-3.88352	-3.57273	10.471
Scf_2R	189	2063384	-3.31314	-4.10511	-3.05157	10.4698
Scf_2L	2241	22113103	-3.34013	-4.05441	-3.07506	10.4696
Scf_3R	2816	26644777	3.30118	2.70014	4.46549	10.4668
Scf_3L	2716	23552820	-2.55254	-3.67129	-4.24285	10.4667
Scf_3R	429	4902662	3.301	4.32012	2.84319	10.4643
Scf_X	1650	20387170	-2.54828	-3.95586	-3.94584	10.45
Scf_3L	700	6212859	-3.2153	-3.2272	4.00118	10.4437
Scf_2R	1122	11845335	-1.75956	-5.69582	-2.98725	10.4426
Scf_X	1533	19120518	-3.73036	-3.68324	-3.02852	10.4421
Scf_2L	2242	22120161	-2.42796	-3.80293	-4.20137	10.4323
Scf_2R	1347	13871290	-2.52801	-3.23734	4.66369	10.429
Scf_2L	2296	22898795	2.85995	-3.77221	-3.78834	10.4205
Scf_X	254	4328365	2.8336	3.43186	4.14748	10.4129
Scf_3R	764	7576645	-2.857	4.4062	3.14831	10.4115
Scf_2L	2225	21850766	-4.15196	2.6094	-3.63066	10.392
Scf_2R	114	1240953	-3.45148	-4.41841	-2.51784	10.3877
Scf_3L	2418	19799344	-4.42378	-3.30782	-2.64985	10.3814
Scf_2R	31	520937	-3.48545	-3.36864	-3.52637	10.3805
Scf_2L	2134	20610969	-4.5882	-2.62417	-3.11818	10.3305
Scf_X	1680	20666796	-3.2714	-3.26638	-3.79056	10.3283
Scf_3L	2715	23551420	-2.53075	-3.10185	-4.69452	10.3271
Scf_2R	153	1688398	-3.9097	-3.26942	-3.14623	10.3253
Scf_2L	2313	23170385	-3.88869	-3.12605	-3.29005	10.3048
Scf_2R	66	751606	-3.52765	-4.06897	-2.68445	10.2811
Scf_X	1646	20344858	-4.17574	-2.67661	-3.41471	10.2671
Scf_2L	2292	22872442	-2.96508	-3.62768	-3.66003	10.2528
Scf_2L	2182	21245376	-4.95932	-2.47894	-2.78392	10.2222
Scf_X	1550	19357416	-3.88452	-2.81972	-3.51632	10.2206
Scf_2L	683	6947072	3.23972	2.04509	4.93539	10.2202
Scf_2R	1649	17036763	3.17777	3.35701	-3.68086	10.2156
Scf_3L	1613	13393438	1.66989	4.37818	4.15958	10.2076
Scf_3L	2406	19678925	3.13573	2.97249	4.08613	10.1943
Scf_3R	2404	22136450	4.67662	3.18909	-2.32161	10.1873
Scf_X	144	2946331	3.76959	3.02817	3.38951	10.1873
Scf_3R	0	8379	-3.83563	-3.31391	-3.02349	10.173
Scf_2L	2224	21847313	-3.92072	-2.70597	-3.54614	10.1728
Scf_3R	381	4379443	-3.58767	2.76306	-3.81668	10.1674
Scf_2L	2251	22157146	-3.02963	2.83053	4.30511	10.1653
Scf_3L	2757	24102415	-4.13934	-2.88714	-3.13517	10.1616
Scf_X	1615	20213490	-3.55316	-4.16246	-2.41231	10.1279
Scf_2L	2297	22902452	-3.29732	-3.93425	-2.88782	10.1194
Scf_X	1629	20272334	-3.73009	-3.94789	-2.44133	10.1193
Scf_2L	1090	10641740	-2.43626	-3.87006	-3.80605	10.1124
Scf_X	1658	20452436	-3.24512	-2.71808	-4.14315	10.1063
Scf_X	407	5958095	-3.17034	4.09266	2.8209	10.0839
Scf_2R	269	3091190	-2.31986	-4.2063	-3.53116	10.0573
Scf_2L	2210	21629054	3.20538	2.74215	4.10147	10.049
Scf_X	977	11953202	-2.79754	-2.92156	-4.32602	10.0451
Scf_2R	176	1982004	3.0518	2.63259	4.35862	10.043
Scf_3L	1124	9229878	3.76702	2.93488	3.33697	10.0389
Scf_X	1634	20304791	-3.08043	-3.81897	-3.12979	10.0292
Scf_X	1689	20767950	-3.20971	-3.01851	-3.79498	10.0232
Scf_3L	14	302725	-3.73917	-3.54605	-2.72822	10.0134
Scf_X	1476	18449086	3.90762	-3.17511	-2.91962	10.0023
Scf_2L	2324	23333288	-2.86896	-2.48009	-4.64674	9.99578
Scf_3R	2	26398	-3.66948	-3.55175	-2.76632	9.98755
Scf_2R	1995	21497053	-2.93803	-4.24753	-2.80169	9.98725
Scf_3L	1471	12045302	3.44879	2.59707	3.92765	9.97351
Scf_2R	88	898262	-3.01426	-3.63483	-3.32225	9.97134
Scf_2R	273	3123025	-1.96077	-4.47874	-3.52374	9.96325
Scf_2L	2217	21742407	2.15252	-3.34354	-4.466	9.96205
Scf_2R	233	2636993	-3.67484	-3.96036	-2.28306	9.91826
Scf_3R	277	3262549	2.8459	4.31214	2.75352	9.91156
Scf_3L	1678	13864702	-2.31478	2.75098	4.82436	9.89012
Scf_3L	1436	11727320	2.1576	2.89606	4.83259	9.88624
Scf_2R	51	668877	-3.00432	-3.57912	-3.30102	9.88446
Scf_2L	403	4031632	3.06639	-2.82465	3.98881	9.87984
Scf_3R	1039	9837016	-3.24267	3.05477	3.57583	9.87327
Scf_2L	2163	20932892	-3.1603	-3.01559	-3.69649	9.87238
Scf_X	261	4418081	-3.25868	-2.87147	-3.7385	9.86865
Scf_3L	1117	9184377	2.82435	3.04349	4.00018	9.86802
Scf_X	1244	15356167	4.43119	3.53034	1.89116	9.85269
Scf_2R	92	992154	-2.99932	-3.10144	-3.74208	9.84284
Scf_3L	1435	11726894	3.01677	-2.12469	4.7002	9.84167
Scf_3R	1022	9756076	-4.25319	2.59626	2.98674	9.83618
Scf_3L	2647	22370005	-2.96443	-2.76644	-4.10049	9.83136
Scf_X	1360	16792714	-3.8437	-3.4261	2.55297	9.82276
Scf_2L	2341	23471396	-2.98942	-3.86141	-2.96541	9.81624
Scf_2R	660	7593015	-3.40954	2.92637	3.47635	9.81226
Scf_2R	1742	17975001	-3.16022	2.28178	-4.36478	9.80678
Scf_2R	91	981647	-2.4159	-4.15596	-3.229	9.80086
Scf_3R	406	4643287	3.42192	-3.13571	-3.24251	9.80014
Scf_X	1687	20750897	-2.89276	-4.81188	-2.09523	9.79987
Scf_X	316	4893690	3.4046	-3.29231	3.09983	9.79675
Scf_2R	214	2415146	2.19057	2.53077	5.07042	9.79176
Scf_3R	721	7294517	3.79964	3.29055	2.69754	9.78772
Scf_3R	2492	23122802	-3.01664	-3.79189	-2.96614	9.77467
Scf_3L	2659	22796614	-3.82791	-2.79231	-3.14006	9.76028
Scf_3L	2623	22195341	-2.95993	-2.83075	-3.96857	9.75926
Scf_2L	2274	22586019	-3.97712	-2.61285	3.16927	9.75923
Scf_2L	2302	22980616	-2.97131	-2.78101	-4.00565	9.75797
Scf_3L	2550	21217213	3.94795	-2.9716	2.83171	9.75126
Scf_3L	2684	23103217	-3.33452	-2.99425	-3.39751	9.72627
Scf_2L	253	2601633	2.10216	-3.43993	-4.17948	9.72157
Scf_2L	2036	19561447	-2.59544	-2.84391	-4.26926	9.70861
Scf_2R	216	2429683	-3.72073	2.86725	3.11859	9.70656
Scf_2R	182	2008710	-3.74225	-2.16354	-3.78512	9.69091
Scf_X	1674	20583611	-3.39915	-3.36393	-2.91398	9.67705
Scf_3L	2678	23063171	2.59905	-3.96026	-3.11722	9.67654
Scf_2R	1451	14980864	-3.56737	2.79897	-3.30713	9.67347
Scf_3L	1123	9227194	3.29123	3.69236	2.68957	9.67316
Scf_2L	2319	23323115	-2.70805	-3.59159	-3.36172	9.66137
Scf_3L	2158	17573374	3.06139	-4.39097	2.20886	9.66121
Scf_2R	931	10183865	3.12563	2.56024	3.97422	9.66009
Scf_3R	2219	20166668	-4.07562	-3.80416	-1.77494	9.65471
Scf_3L	2685	23105277	-2.98811	-2.96104	-3.70518	9.65433
Scf_2R	232	2619456	3.46096	2.04931	4.13759	9.64786
Scf_3R	1293	12019413	-1.85075	-3.59664	-4.19908	9.64647
Scf_X	1262	15566835	-3.93063	-2.20358	-3.50609	9.6403
Scf_3L	2742	23994956	-3.39524	-2.92268	-3.31189	9.62981
Scf_2R	53	669097	3.47821	2.46809	-3.66645	9.61275
Scf_3R	213	2622665	-3.93002	-2.95435	-2.69981	9.58419
Scf_3R	1930	17567807	2.60519	2.41467	4.5608	9.58065
Scf_X	396	5781550	-3.72387	-2.62454	-3.22502	9.57344
Scf_2R	1265	13205302	2.66976	4.13924	-2.75549	9.56449
Scf_X	1502	18683120	-2.16688	-3.41935	-3.97329	9.55952
Scf_2L	2334	23444815	-3.02744	-2.92409	-3.59296	9.54449
Scf_2R	105	1159332	4.15109	-2.29944	-3.09086	9.54139
Scf_3R	2629	24566976	2.58313	4.6999	2.25735	9.54038
Scf_2R	282	3230399	-3.97311	-2.98912	2.57744	9.53966
Scf_3R	2590	24186379	3.76323	2.39352	3.38267	9.53942
Scf_X	1611	20183468	-2.71883	-3.07387	-3.74517	9.53787
Scf_3L	127	1194263	-2.92336	-3.40499	-3.20091	9.52927
Scf_X	1220	14747506	-2.3928	3.13787	-3.99566	9.52634
Scf_2L	2025	19406420	2.68286	-2.95272	-3.88786	9.52344
Scf_3L	2603	21925505	3.04155	3.0058	-3.46931	9.51666
Scf_2R	1645	17012206	-3.65465	-3.05596	-2.80232	9.51293
Scf_2L	2048	19758362	2.36991	-4.73376	2.4059	9.50958
Scf_3R	178	2186064	3.72656	3.31309	2.469	9.50866
Scf_2L	2330	23408983	-3.37632	-2.84073	-3.28332	9.50036
Scf_2L	721	7184925	2.48709	3.73092	3.28211	9.50012
Scf_2L	2309	23120813	-3.18759	-2.38821	3.92055	9.49636
Scf_2R	80	797893	4.08889	-2.75675	-2.64788	9.49352
Scf_2R	1176	12438290	-1.65025	3.89926	3.94227	9.49178
Scf_X	1671	20533390	2.30376	-3.29047	3.89542	9.48965
Scf_3L	1102	9065454	3.3187	3.43717	-2.7327	9.48857
Scf_3R	113	1348496	3.95115	-3.38404	-2.15051	9.4857
Scf_2L	2039	19600968	-2.36492	-4.49758	-2.61932	9.48182
Scf_2R	357	4051173	3.96816	-2.70005	2.79778	9.46599
Scf_2L	594	6049943	3.19888	3.19533	3.0679	9.46212
Scf_3L	1359	11000422	-3.99254	-3.32517	-2.13828	9.45599
Scf_3R	445	5080407	3.88876	-2.33424	3.23069	9.45369
Scf_3L	1178	9682142	2.74412	3.39557	3.30152	9.44121
Scf_2L	2181	21238610	-2.20117	-3.18994	-4.04783	9.43895
Scf_3L	2699	23331989	-2.74033	-3.50235	-3.18538	9.42805
Scf_2R	202	2226374	-2.53626	-2.83096	-4.05655	9.42377
Scf_3L	2223	18123676	2.46325	-3.02089	-3.92448	9.40863
Scf_X	1145	13801759	-2.89172	-3.26871	-3.23928	9.3997
Scf_2R	242	2776559	3.48465	2.61888	3.29466	9.3982
Scf_2L	2112	20359623	3.10075	3.20418	3.08992	9.39485
Scf_3R	303	3663845	4.39566	-2.43315	2.55242	9.38122
Scf_3R	2141	19573339	-4.44109	-1.98869	-2.94913	9.37891
Scf_2R	147	1651165	-4.05311	-2.35836	-2.96337	9.37484
Scf_2R	1188	12528816	2.4574	2.37382	4.54067	9.37189
Scf_3R	2850	27132133	-3.16172	-3.87931	-2.3279	9.36892
Scf_2R	332	3803056	-3.08721	3.52479	-2.75175	9.36374
Scf_2L	2206	21574653	2.57506	2.67438	4.11135	9.3608
Scf_2R	152	1684116	-3.36984	-1.56713	-4.42374	9.36071
Scf_3R	217	2676374	3.90129	2.94969	2.50673	9.35771
Scf_2R	921	10111337	-3.08341	3.17144	3.0942	9.34905
Scf_2R	600	7074996	-3.86087	-2.84226	2.64339	9.34651
Scf_3L	2677	23059180	-2.75477	-3.71861	2.87241	9.34579
Scf_X	64	1990901	-4.81538	-2.91363	1.61227	9.34128
Scf_2R	2	20821	-3.41564	-2.38814	-3.53353	9.33731
Scf_2L	2155	20863731	-2.91162	-2.91129	-3.50644	9.32935
Scf_2L	2257	22329854	3.08483	-3.62292	2.62126	9.32901
Scf_3R	1329	12435000	3.55878	3.40055	2.36098	9.32031
Scf_2R	1284	13345447	4.31252	2.56234	-2.4446	9.31946
Scf_3R	2254	20721322	-2.9603	-2.78001	-3.57378	9.31408
Scf_3L	17	349325	2.86412	2.00688	4.42959	9.30059
Scf_2R	170	1922248	2.4086	-3.55909	-3.33094	9.29864
Scf_3L	1115	9170271	2.64067	4.08803	2.56212	9.29083
Scf_X	1639	20319892	-3.40031	-2.46265	-3.41495	9.27792
Scf_X	1413	17453055	3.09697	2.74304	3.43591	9.27591
Scf_2L	163	1721171	3.55864	1.7974	3.91834	9.27438
Scf_3R	433	4961151	3.5777	3.50212	2.19395	9.27377
Scf_3R	1148	10734435	2.4565	3.03436	3.7761	9.26696
Scf_2L	2231	22002741	-2.3084	-2.45882	-4.49767	9.26489
Scf_3L	2382	19406486	3.7691	2.53323	2.96011	9.26244
Scf_3L	2616	22121412	-3.8445	2.8892	2.52621	9.25991
Scf_2L	2323	23327385	-3.20544	2.63073	-3.41943	9.2556
Scf_2R	1046	11147092	-2.66927	-3.66765	2.91785	9.25476
Scf_3R	579	6128852	2.75192	3.20549	-3.29584	9.25324
Scf_3R	1943	17648817	-2.17043	2.15899	4.92001	9.24944
Scf_X	428	6191676	-3.91139	-2.78193	-2.55088	9.24419
Scf_3R	1232	11441710	3.60326	-2.52702	3.11304	9.24331
Scf_3L	2547	21175347	3.32504	2.48882	-3.41876	9.23262
Scf_X	1506	18731608	2.54995	-3.10958	-3.57136	9.2309
Scf_3R	857	8336647	-3.94147	-2.80246	2.48665	9.23058
Scf_2R	227	2560211	2.76931	-3.01204	-3.44802	9.22937
Scf_X	1281	15889285	2.68707	3.82936	2.70854	9.22497
Scf_3L	2572	21560917	2.56169	2.94748	3.7153	9.22447
Scf_3L	357	3315153	2.99281	3.04081	3.18659	9.22021
Scf_3R	28	455704	2.24842	3.73076	3.23865	9.21783
Scf_2L	2305	23057168	2.43633	-2.69651	-4.08371	9.21654
Scf_X	1403	17300068	-2.30582	-2.56517	4.34007	9.21106
Scf_2L	1304	12469487	-2.74051	2.38472	4.08313	9.20836
Scf_3L	941	7842337	2.57544	4.37111	-2.25488	9.20143
Scf_3R	199	2447742	4.17084	1.70577	3.31713	9.19374
Scf_2R	62	725870	-3.13999	-2.70334	-3.34876	9.19208
Scf_3L	1961	15968014	-3.00404	2.75942	3.42774	9.1912
Scf_3L	2137	17498166	2.62183	3.11284	3.45433	9.189
Scf_2L	2342	23503111	-2.56228	2.97496	3.64551	9.18275
Scf_X	117	2675486	-2.78126	-2.84118	-3.55737	9.17981
Scf_3R	173	2164138	4.14106	2.17604	2.86162	9.17873
Scf_2L	168	1765088	2.65234	2.82892	3.69499	9.17625
Scf_3L	299	2704599	-3.97049	3.09522	2.10791	9.17363
Scf_3R	22	344847	3.22684	2.42657	3.51272	9.16613
Scf_3R	632	6544232	2.66535	3.52585	2.9744	9.1656
Scf_2L	2186	21309177	-4.05577	-2.87769	2.23153	9.16499
Scf_2R	1823	18881154	-3.24571	-2.10149	-3.81705	9.16424
Scf_2L	354	3642021	-2.28713	4.88757	1.98832	9.16302
Scf_3L	1924	15663954	-2.75759	3.36022	3.03159	9.1494
Scf_3R	498	5492146	-3.78317	-3.10331	-2.25248	9.13896
Scf_2L	1130	10973635	3.80306	-2.98107	2.35243	9.13656
Scf_2L	2018	19345352	2.8181	4.06443	2.25142	9.13396
Scf_3R	582	6141778	3.25684	-3.17041	2.70657	9.13382
Scf_X	1512	18819479	-2.02938	3.67778	-3.4182	9.12536
Scf_3L	2754	24075966	2.77363	-3.08198	-3.26372	9.11933
Scf_X	1362	16808448	3.01827	-3.11258	-2.98093	9.11178
Scf_3R	729	7373590	3.50963	2.6123	2.9843	9.10623
Scf_2L	2311	23159660	3.17009	-2.6907	-3.24487	9.10566
Scf_3L	1708	13987061	2.50972	3.21237	-3.37724	9.09932
Scf_2R	1890	19632383	2.89995	-3.43519	-2.75859	9.09373
Scf_3L	2642	22350796	-3.07895	3.01173	-3.00265	9.09333
Scf_3L	1640	13639966	2.57563	2.84884	3.66537	9.08984
Scf_2R	178	1989583	3.45587	-3.00916	-2.62319	9.08822
Scf_3R	1325	12391498	1.82358	4.31997	2.93962	9.08317
Scf_3R	32	525692	-2.69947	3.00866	3.37424	9.08237
Scf_3R	1219	11370112	-3.27361	-2.00647	3.80043	9.08051
Scf_3R	2363	21753483	2.38892	-4.01232	2.67414	9.07537
Scf_3R	1310	12221975	-2.82028	-2.94215	3.31281	9.07524
Scf_3L	2724	23707730	-2.1487	-2.8103	-4.11601	9.075
Scf_2R	131	1400087	-2.49318	-3.09233	3.48416	9.06967
Scf_3R	823	7967329	3.98174	-2.62096	2.46215	9.06485
Scf_2L	376	3843298	4.08428	1.88033	-3.09535	9.05996
Scf_3R	77	972131	2.38282	-3.72463	-2.94616	9.05361
Scf_3L	2727	23731993	-3.50881	2.06297	-3.48089	9.05266
Scf_2L	1270	12161113	3.02586	3.28131	2.74308	9.05025
Scf_3R	1218	11364426	-3.59862	2.60115	2.84764	9.04741
Scf_2R	201	2220411	-3.57105	-3.51763	1.95787	9.04655
Scf_2R	145	1600460	-2.12086	-2.94815	-3.97445	9.04346
Scf_X	1136	13689012	-2.96506	3.2329	2.84157	9.03953
Scf_2L	2249	22152900	-2.62807	-3.39714	-3.01369	9.0389
Scf_3L	886	7586746	2.21935	-3.18972	-3.6293	9.03838
Scf_2R	1634	16889451	3.53942	-2.53118	2.96379	9.03439
Scf_2L	1267	12133209	3.1893	3.42273	2.41564	9.02766
Scf_3L	1811	14699792	3.21957	-2.18181	3.62329	9.02467
Scf_3L	2375	19350127	-2.90782	-3.49792	-2.6137	9.01944
Scf_3R	348	4083105	4.08346	1.98615	2.94844	9.01804
Scf_3L	1711	13993133	2.16456	4.40268	2.45048	9.01772
Scf_2R	158	1747206	2.82366	3.73694	2.45641	9.01702
Scf_3L	896	7645665	2.8692	2.50232	-3.64312	9.01464
Scf_2R	1473	15215151	2.25051	3.30742	3.45441	9.01234
Scf_3R	1894	17328070	2.82758	3.54875	2.63487	9.0112
Scf_2L	2148	20836099	-2.39482	-3.71022	-2.90414	9.00918
Scf_2R	679	7771430	-2.82455	3.36472	2.81981	9.00908
Scf_2R	0	423	3.42	-2.20409	3.38455	9.00864
Scf_2L	411	4147576	2.35428	-3.31004	3.33985	9.00417
Scf_3L	655	5729420	-3.0599	2.38353	3.56063	9.00406
Scf_3R	302	3648952	4.32875	-2.03021	2.64445	9.00341
Scf_2L	692	6996774	2.08025	4.09307	-2.82993	9.00325
Scf_3R	1889	17300687	2.56812	3.40184	3.03283	9.00279
Scf_2R	150	1682060	-3.64794	2.03946	-3.3146	9.00199
Scf_3L	2650	22406955	-3.092	2.12863	-3.77579	8.99643
Scf_2R	286	3259702	2.59723	2.97589	3.41527	8.98839
Scf_3R	630	6529276	-2.85844	-3.19371	2.93118	8.98333
Scf_3L	1319	10660794	2.7649	3.08148	3.13598	8.98236
Scf_3R	1105	10440734	4.42868	2.32712	2.22337	8.97917
Scf_2R	132	1427187	-2.90618	-2.16953	-3.90329	8.979
Scf_2R	55	696655	-2.08422	3.79408	3.10027	8.97856
Scf_3L	2125	17286976	3.24016	3.66457	2.06919	8.97393
Scf_2L	2211	21629399	2.77528	2.67482	3.5235	8.9736
Scf_2R	43	614695	-3.00334	-3.07646	-2.88946	8.96926
Scf_2R	181	2003359	3.06545	-2.66732	-3.233	8.96576
Scf_3R	158	2071931	-1.9192	3.17571	3.87008	8.96499
Scf_3R	50	696976	-3.58004	3.49997	-1.88464	8.96465
Scf_2L	648	6640529	3.32686	2.79227	2.84547	8.96461
Scf_3R	108	1272784	3.94029	-2.68845	2.32679	8.95553
Scf_3R	733	7418387	3.43443	-2.408	3.10742	8.94985
Scf_3R	2591	24196832	1.91755	2.62226	4.40712	8.94694
Scf_2L	2273	22561560	-2.79524	3.18192	-2.964	8.94117
Scf_3R	271	3200211	2.60411	-2.46126	3.8747	8.94008
Scf_3L	2310	18780081	3.10405	2.31736	3.51021	8.93162
Scf_2L	541	5393815	-2.47109	2.77194	3.68369	8.92672
Scf_X	1321	16349496	3.16874	2.18508	3.56674	8.92056
Scf_3R	821	7935322	2.17237	3.69061	3.05695	8.91993
Scf_2R	510	6016586	-2.62364	-4.54643	-1.7498	8.91987
Scf_3L	1208	9993453	-2.45868	3.28465	3.17488	8.91821
Scf_3L	666	5850039	2.68918	2.87601	3.35203	8.91722
Scf_3L	452	3897590	3.21428	2.60027	-3.10027	8.91481
Scf_2L	947	9070903	-1.99437	4.56568	2.34887	8.90892
Scf_3R	982	9436862	-2.38002	3.05982	3.46693	8.90678
Scf_3R	55	765022	3.94638	-3.19055	-1.76648	8.90341
Scf_3R	309	3752377	-3.35712	2.44866	3.09561	8.90139
Scf_3R	349	4089994	2.40509	2.41805	4.07111	8.89425
Scf_X	1227	15029465	2.69066	4.16119	-2.04201	8.89386
Scf_3R	1174	10990606	2.29379	2.47726	4.11806	8.88911
Scf_3R	2469	22914358	-2.10197	4.42958	2.35215	8.8837
Scf_3L	893	7635634	2.77042	3.74492	-2.35543	8.87077
Scf_3R	1060	10024879	4.36278	-2.03335	-2.4732	8.86934
Scf_X	1660	20465555	-3.08227	-2.34883	-3.43348	8.86457
Scf_3L	1126	9248046	-3.16884	2.43071	-3.25385	8.85341
Scf_3R	377	4329738	3.00125	3.06925	2.78279	8.85329
Scf_2R	138	1466396	-3.02955	-3.58434	-2.23534	8.84923
Scf_3R	2559	23888901	2.68503	2.69689	3.46133	8.84325
Scf_3L	1096	9006750	3.83089	2.30767	2.69833	8.8369
Scf_X	12	141106	-3.49297	-2.94053	-2.38916	8.82266
Scf_2R	1628	16831065	-3.15785	-2.84849	2.80534	8.81168
Scf_2R	1611	16595005	-2.94864	-2.38007	3.47119	8.7999
Scf_3L	769	6710859	1.82265	4.10195	2.87507	8.79967
Scf_2L	2173	21119582	-1.87653	-2.56254	-4.35854	8.79761
Scf_3L	1429	11664976	2.17841	2.82932	3.78659	8.79432
Scf_2L	647	6621446	3.12373	2.37388	3.29576	8.79337
Scf_3R	2282	20958780	2.81866	2.32548	3.64319	8.78733
Scf_3R	1197	11225910	3.72597	2.87265	2.18847	8.7871
Scf_3R	1778	16258307	2.80026	3.53144	2.45451	8.78622
Scf_2R	930	10171906	-3.71507	2.31857	2.74854	8.78218
Scf_3R	1820	16670821	2.47458	-2.66558	3.64104	8.7812
Scf_3L	1175	9637561	-2.27974	-2.5925	3.90717	8.77941
Scf_3R	304	3678049	3.57169	2.46151	2.74586	8.77906
Scf_2L	2158	20887969	-3.84978	-2.52494	-2.40313	8.77785
Scf_3R	2234	20387109	3.10232	3.43604	-2.22771	8.76607
Scf_2R	52	668974	-3.16969	2.59483	-2.99953	8.76406
Scf_3L	441	3812819	1.77693	3.32264	-3.65474	8.75432
Scf_2R	117	1248491	-3.2696	-3.05686	2.42751	8.75398
Scf_3L	923	7768491	-2.79398	3.63597	-2.32315	8.75309
Scf_X	1310	16177677	-3.84407	2.98543	1.92359	8.75309
Scf_2R	1102	11622042	2.33061	3.28256	3.13895	8.75212
Scf_2R	98	1040427	-3.1521	-2.71687	2.88295	8.75191
Scf_2R	1408	14492557	3.15332	1.74137	3.85081	8.7455
Scf_2R	1614	16676250	3.15579	2.35078	3.23387	8.74044
Scf_2R	124	1358420	2.05574	-4.10038	-2.58241	8.73853
Scf_3R	393	4516250	-2.83242	-3.66542	-2.2403	8.73814
Scf_3L	884	7574554	2.99485	2.90186	2.84093	8.73764
Scf_3L	1111	9145517	-3.01361	2.18065	3.54313	8.73739
Scf_3L	2124	17275437	-2.96733	-2.3764	3.38743	8.73116
Scf_2R	1764	18215894	-2.45594	3.39039	2.879	8.72533
Scf_2R	665	7620618	2.49216	-2.73612	3.49595	8.72424
Scf_2L	760	7483148	3.81984	3.04794	1.85605	8.72383
Scf_3L	2747	24033715	-3.66779	-2.96476	-2.08913	8.72168
Scf_2R	925	10137040	3.62685	-2.08782	3.00483	8.71949
Scf_X	54	1594984	2.05697	-4.02208	2.63825	8.7173
Scf_2L	1399	13294498	3.13908	2.31355	3.2643	8.71693
Scf_3L	2655	22607570	-3.12991	-2.85648	-2.72926	8.71565
Scf_3L	1120	9201880	2.40536	3.66582	-2.64429	8.71547
Scf_2R	263	3010929	-2.45608	2.65513	3.60325	8.71447
Scf_2R	1768	18250707	1.96046	3.40313	3.34851	8.71211
Scf_2L	2335	23445599	-3.0794	-2.89781	-2.73389	8.71111
Scf_3L	1607	13340395	2.45441	3.04109	3.21503	8.71052
Scf_3R	2795	26212713	-1.69293	-3.73679	-3.27728	8.707
Scf_3L	1279	10455037	-3.65227	2.36774	2.68697	8.70697
Scf_2R	652	7561341	1.90832	-3.49289	-3.30389	8.7051
Scf_2R	1247	13036292	3.00044	2.21389	3.49034	8.70467
Scf_2L	2293	22876649	-2.68081	2.04708	-3.97666	8.70456
Scf_2R	102	1109208	-3.61367	-2.59771	-2.48587	8.69725
Scf_3R	2557	23857695	2.41876	-2.97315	-3.30421	8.69612
Scf_X	894	10967800	3.44739	-2.2547	2.98894	8.69103
Scf_2R	363	4119883	2.47806	3.46669	2.74564	8.69039
Scf_3R	1377	13020218	-2.42707	2.76035	3.50234	8.68976
Scf_3R	1037	9826576	3.33211	-2.45488	-2.90089	8.68788
Scf_3L	2608	21986173	-2.60213	-4.12326	-1.96046	8.68585
Scf_3L	2713	23523551	-3.42479	2.03441	-3.22613	8.68533
Scf_3R	1208	11315667	-2.73282	-2.69361	-3.25694	8.68337
Scf_2L	2215	21688159	-2.24908	-2.96125	-3.47254	8.68286
Scf_2L	2122	20450549	-3.08845	-2.03717	3.55709	8.68272
Scf_3L	774	6738028	1.98969	-3.14024	3.55209	8.68202
Scf_2L	2320	23323781	3.83033	2.32128	2.52915	8.68076
Scf_2L	2237	22096576	-3.06507	-2.00934	-3.60279	8.6772
Scf_2R	1043	11123323	-2.38376	-3.05475	3.23609	8.6746
Scf_3R	689	7021208	2.34225	4.24384	2.08757	8.67366
Scf_2R	34	553492	2.25618	-1.87714	4.5357	8.66901
Scf_3R	1527	14456425	-3.57414	2.53814	2.556	8.66828
Scf_2R	1897	19786107	2.84748	2.54778	3.26903	8.66429
Scf_3L	1076	8877148	3.42415	-2.37588	2.86088	8.66091
Scf_2R	1507	15517611	3.20542	-2.85209	-2.6033	8.66081
Scf_3L	800	6922619	2.70783	3.20676	2.74566	8.66025
Scf_2R	245	2787492	-3.60977	2.5757	-2.47131	8.65678
Scf_2R	1225	12873206	-3.74939	2.08197	-2.8223	8.65366
Scf_3R	1908	17412733	3.12188	2.61078	-2.92005	8.65271
Scf_X	925	11429649	-2.99751	3.89994	-1.75303	8.65047
Scf_X	508	7157092	-3.66766	-2.12561	-2.85686	8.65013
Scf_3R	2081	19058551	3.39795	-2.4086	2.84313	8.64967
Scf_3L	2299	18715782	2.13718	2.08267	4.42582	8.64567
Scf_2L	2166	20992793	-2.9992	-3.01051	-2.63504	8.64475
Scf_3R	2402	22112164	-3.48838	2.54192	2.61405	8.64435
Scf_3R	636	6590915	-4.76315	-1.62294	2.25775	8.64384
Scf_3R	16	269653	-2.52618	-2.75997	3.35762	8.64378
Scf_2R	173	1940013	-4.01651	-2.16168	-2.46248	8.64067
Scf_2R	1771	18262018	-2.92193	3.48212	2.23499	8.63905
Scf_2R	143	1561082	1.676	-4.00976	-2.95166	8.63743
Scf_3R	561	5949315	2.79755	2.98023	2.85925	8.63703
Scf_3L	2627	22223293	-1.93795	-3.99464	-2.7043	8.63689
Scf_2R	1163	12288788	-2.86583	3.10969	-2.66071	8.63623
Scf_2R	1526	15678064	-2.94641	2.84714	2.84024	8.63379
Scf_2R	644	7459216	2.83012	2.99476	2.80376	8.62864
Scf_3L	2211	17983520	2.46389	4.00972	2.15297	8.62657
Scf_2L	814	7922228	-3.19609	3.30469	-2.1236	8.62438
Scf_2R	12	127943	-3.89447	-2.61199	2.11622	8.62267
Scf_2L	815	7951499	-2.0115	-2.61132	3.99953	8.62235
Scf_2L	1445	13729325	3.18079	2.75273	2.6861	8.61962
Scf_3R	843	8235356	-2.76119	3.24743	2.6063	8.61491
Scf_3R	313	3784577	4.01101	1.86585	2.73793	8.61479
Scf_3L	2322	18886801	2.36601	4.14287	2.10445	8.61333
Scf_3L	2640	22343509	-2.79594	-2.26852	3.54552	8.60998
Scf_2L	98	1296677	-2.80315	1.68956	4.11568	8.60838
Scf_3L	2750	24046637	3.08272	-2.80969	-2.71325	8.60566
Scf_X	668	8561173	2.21207	-3.40776	2.98543	8.60527
Scf_2L	1281	12264733	-2.7036	2.72239	3.1792	8.60518
Scf_3R	631	6537207	2.9183	2.20994	3.47591	8.60415
Scf_X	1453	18080304	-3.10143	1.88267	-3.6195	8.60359
Scf_3R	1459	13815532	2.78584	3.24949	2.56603	8.60136
Scf_X	1296	16004960	-2.64982	-2.2179	-3.73067	8.5984
Scf_X	1584	19865805	-2.06973	2.41695	4.10928	8.59596
Scf_3L	1176	9652564	2.00291	3.0869	3.5034	8.59321
Scf_3R	426	4857349	-3.10916	-3.07859	2.40518	8.59294
Scf_2R	350	4024475	2.96158	3.72404	1.90425	8.58988
Scf_2R	108	1232000	2.28068	3.02302	3.28473	8.58843
Scf_3R	1837	16836705	-2.99211	-2.33557	3.26021	8.58789
Scf_3R	296	3579449	3.8058	1.78722	2.99127	8.58429
Scf_2L	2198	21467337	-2.72881	-3.89417	-1.95988	8.58286
Scf_2R	1621	16764660	-2.89767	2.87066	2.81317	8.5815
Scf_2L	2176	21173139	-2.80948	-3.15125	-2.61897	8.57971
Scf_3L	2383	19420373	2.56383	2.7862	3.22848	8.57851
Scf_3R	106	1239252	3.54795	2.60032	-2.42993	8.5782
Scf_X	95	2430769	2.50276	3.42159	2.65366	8.57802
Scf_3L	132	1245375	2.4189	2.08621	4.07266	8.57777
Scf_3R	876	8481832	4.36403	2.64935	-1.56306	8.57644
Scf_3R	343	3960590	3.34681	-2.16066	3.06891	8.57638
Scf_3R	440	5047338	3.31641	3.83473	-1.42302	8.57416
Scf_3L	1547	12744671	2.91006	-3.28456	2.37909	8.57372
Scf_3R	626	6499445	-3.21531	2.95185	-2.40493	8.57209
Scf_3L	1292	10524792	2.7587	-2.39871	3.41208	8.56949
Scf_2L	2132	20598203	2.8649	-2.25915	-3.4447	8.56875
Scf_3R	133	1566667	3.10872	-2.30665	3.15303	8.56839
Scf_2L	489	4959402	2.80123	2.7957	-2.97032	8.56724
Scf_3R	2201	20040338	2.13621	4.22433	-2.20611	8.56665
Scf_3R	1911	17433704	4.02229	-2.11703	2.42423	8.56355
Scf_3R	859	8352903	-2.08068	3.57962	2.89721	8.55751
Scf_3L	843	7246780	-2.71949	3.10061	2.73742	8.55751
Scf_3L	1144	9410782	3.40042	3.32473	-1.83028	8.55543
Scf_X	1138	13726218	-1.93345	-3.7957	2.82315	8.5523
Scf_3L	2643	22356719	2.29041	-2.8635	-3.39519	8.5491
Scf_3R	1054	10001759	-2.14675	-4.16331	2.23763	8.54769
Scf_3R	378	4333372	2.44017	4.055	-2.05085	8.54603
Scf_3L	1799	14593898	-2.70864	3.26951	2.56697	8.54512
Scf_3R	1540	14613142	2.39139	3.12518	3.02643	8.543
Scf_2R	395	4570761	2.93319	-2.23978	3.3699	8.54288
Scf_2L	2272	22473661	-1.96047	-2.65481	-3.92563	8.5409
Scf_3R	2126	19451403	2.79263	-3.54996	-2.19674	8.53933
Scf_3L	1140	9368759	-3.72912	-2.14882	2.66061	8.53855
Scf_X	24	748948	3.91177	-2.01632	2.60253	8.53063
Scf_3R	1294	12037099	-3.55183	2.80694	-2.1684	8.52716
Scf_3R	1446	13681841	-2.3778	3.4491	2.69705	8.52395
Scf_X	41	1147199	2.63226	3.20435	2.68693	8.52354
Scf_3L	1401	11303844	3.17918	2.6392	-2.70483	8.5232
Scf_3R	25	404598	-3.66414	-1.6028	-3.25608	8.52303
Scf_2L	1345	12808192	1.75263	3.60359	3.16347	8.51969
Scf_3L	630	5547955	3.29078	-2.40027	-2.82702	8.51806
Scf_2L	303	3099499	2.74929	2.22895	3.53919	8.51743
Scf_2L	15	402330	2.71016	2.42918	3.37753	8.51688
Scf_2R	284	3249463	2.41815	-3.14104	2.9545	8.51369
Scf_3R	78	976924	3.73571	2.52934	2.24561	8.51066
Scf_2L	693	7004025	3.06702	-3.39546	2.04638	8.50886
Scf_3R	256	2943611	3.62291	-1.96393	-2.9197	8.50654
Scf_2R	44	624964	-3.27769	-2.24733	-2.97981	8.50483
Scf_3R	894	8667064	-3.73537	2.48127	-2.28753	8.50416
Scf_2L	1856	18007541	3.31331	-2.0563	3.13417	8.50378
Scf_3L	1984	16175355	2.5796	-3.42878	2.49316	8.50154
Scf_3L	390	3472330	2.31642	3.98763	2.19512	8.49918
Scf_2R	254	2871915	2.38686	-2.21042	3.89987	8.49715
Scf_X	389	5701960	-3.08385	-2.46801	2.94394	8.4958
Scf_3L	1062	8728508	2.07855	2.9533	3.46363	8.49548
Scf_2L	488	4934886	3.15021	2.69381	2.65122	8.49525
Scf_2R	920	10102501	1.98108	3.26209	3.25157	8.49474
Scf_2R	1626	16818848	-2.46354	-2.58566	3.44427	8.49347
Scf_3R	2248	20678364	-3.15116	-2.92422	2.41635	8.49173
Scf_2L	735	7288612	3.04001	2.25969	-3.1889	8.4886
Scf_3L	1819	14806081	3.00786	3.09398	2.3864	8.48824
Scf_3R	947	9140119	3.14163	2.49821	2.84726	8.4871
Scf_2R	1353	13901018	2.48678	3.05753	-2.94171	8.48602
Scf_2L	1736	16440357	2.3205	2.85248	3.30845	8.48143
Scf_2R	13	274060	-2.69003	-3.48041	-2.30776	8.47821
Scf_3R	1481	13985363	2.7449	2.80024	2.92845	8.47359
Scf_3L	1034	8548194	-2.29986	-2.49522	-3.67832	8.4734
Scf_3R	293	3570358	3.87365	-2.3723	2.22628	8.47223
Scf_3R	2053	18747457	2.4975	-3.47	2.50425	8.47175
Scf_3L	2660	22799876	-1.90913	-3.70647	-2.85471	8.47032
Scf_3L	1641	13644230	3.09102	-2.75257	2.62582	8.4694
Scf_3R	961	9256497	-3.65791	2.17931	-2.63168	8.46891
Scf_2L	575	5771765	3.32221	-2.69625	2.44997	8.46843
Scf_3R	763	7571904	3.51147	1.89087	-3.06084	8.46318
Scf_2L	686	6961006	2.25409	2.95675	3.24915	8.45998
Scf_2L	1645	15857496	-1.91714	3.14807	-3.39467	8.45988
Scf_3L	454	4019413	-1.85889	-1.84829	4.75186	8.45904
Scf_3L	1522	12497419	2.5837	2.62778	-3.24726	8.45873
Scf_3R	2546	23755003	-1.82841	-3.25327	3.37662	8.45831
Scf_3L	2475	20327025	3.54939	2.77332	2.13554	8.45825
Scf_3L	626	5522628	3.22267	-3.05376	-2.17859	8.45502
Scf_3R	9	149774	-2.17349	2.15667	-4.12426	8.45442
Scf_3R	1264	11737161	2.25314	2.53015	-3.67035	8.45364
Scf_2L	322	3337928	-2.10398	2.74783	3.60137	8.45318
Scf_3R	935	9038692	-2.88741	-2.94886	2.61314	8.44941
Scf_3L	2046	16669579	2.61684	-3.09002	2.7389	8.44576
Scf_3R	24	379105	2.5148	2.97389	2.95352	8.4422
Scf_2R	156	1708224	-2.56178	-2.93711	-2.93883	8.43772
Scf_2R	1080	11417757	-2.11082	3.16205	3.16459	8.43746
Scf_X	1142	13772383	2.45965	3.82352	2.14971	8.43289
Scf_X	637	8271162	2.82609	-2.67755	2.92879	8.43243
Scf_3L	788	6834891	3.17524	-2.20495	3.05057	8.43076
Scf_3L	1569	12937464	2.52816	3.04801	2.85402	8.43018
Scf_2R	393	4533818	2.65889	3.77885	-1.99174	8.42949
Scf_3R	475	5231516	1.50407	3.73016	3.19451	8.42874
Scf_2L	824	8007282	3.07372	2.20118	-3.15139	8.42629
Scf_X	1099	13138163	2.05608	2.08222	4.28492	8.42323
Scf_2L	46	702012	1.82837	-1.75505	4.82998	8.41339
Scf_2L	2187	21320186	-3.02485	-2.66243	-2.72426	8.41155
Scf_3L	1478	12124445	2.48077	2.93794	2.99231	8.41101
Scf_3L	952	7910171	-3.86607	-1.85342	2.69146	8.41095
Scf_2R	1842	19093943	2.86256	-2.22941	3.3188	8.41078
Scf_3R	379	4334600	-2.11451	3.87422	2.42164	8.41038
Scf_3R	430	4912476	-1.46195	-4.27834	2.66877	8.40906
Scf_3R	1758	16136381	2.96928	3.58022	1.85686	8.40635
Scf_2R	1889	19614182	3.11925	-2.10235	3.18379	8.40539
Scf_3R	2594	24250280	1.60694	-2.98443	3.81318	8.40455
Scf_3R	2472	22939348	3.1938	-2.20553	3.00455	8.40389
Scf_3R	686	6991029	-2.77859	-2.70383	-2.9199	8.40231
Scf_3L	898	7653278	-2.42559	-2.65921	3.31744	8.40224
Scf_2R	923	10115496	2.78359	2.45852	3.15949	8.4016
Scf_3R	2468	22908958	-3.07395	-3.50683	-1.82061	8.40139
Scf_3R	1759	16150346	2.97946	3.19977	-2.22058	8.3998
Scf_3L	532	4767026	2.81103	2.38812	3.19784	8.39699
Scf_2L	1317	12576651	-2.86918	-2.96508	2.55949	8.39375
Scf_2R	1901	19921353	2.73615	3.14727	-2.50375	8.38717
Scf_2L	1933	18609349	2.85899	4.08716	1.43944	8.3856
Scf_3L	1276	10447637	3.00708	2.4564	2.92066	8.38414
Scf_3L	1224	10086568	-2.70421	-2.4765	-3.20251	8.38323
Scf_3R	1013	9696331	4.46038	2.27042	-1.65149	8.3823
Scf_3R	728	7364712	2.25847	3.57629	2.54675	8.38151
Scf_2R	1974	21030309	2.70931	3.02921	2.64219	8.3807
Scf_3L	1686	13899922	3.21836	3.55075	-1.61142	8.38053
Scf_3L	2524	20792100	3.39048	1.74665	3.24327	8.38039
Scf_2L	73	1063272	2.20461	3.84094	-2.33407	8.37961
Scf_3L	2291	18660334	2.80625	2.12478	3.44455	8.37558
Scf_X	896	10981516	-3.16762	-2.41622	-2.79012	8.37395
Scf_3R	2312	21227824	-2.1631	2.76	3.44913	8.37223
Scf_3L	2615	22106349	-2.4966	2.82376	3.05097	8.37134
Scf_3R	97	1150940	-2.93876	2.49874	2.93287	8.37037
Scf_3R	1595	15001381	-2.84357	2.53629	2.99024	8.37009
Scf_3R	553	5910920	2.90122	-2.74458	-2.72329	8.3691
Scf_2L	1324	12636130	2.51507	2.34626	3.50742	8.36875
Scf_3R	136	1609318	2.76346	2.94306	2.66095	8.36746
Scf_2L	748	7354470	3.65629	1.5633	3.14653	8.36611
Scf_3R	499	5496741	3.89757	2.77347	1.69444	8.36549
Scf_3L	276	2477448	-2.64093	2.96441	-2.75888	8.36422
Scf_3L	2234	18231188	2.44484	3.29689	2.62071	8.36244
Scf_3L	647	5649232	2.37853	2.10422	3.87546	8.35821
Scf_2R	1203	12685558	4.70448	2.19972	1.45356	8.35776
Scf_X	121	2713888	-1.99208	-3.4692	2.8963	8.35757
Scf_3L	209	1902163	3.1666	-1.82574	3.36445	8.35679
Scf_2R	1613	16653260	2.64165	3.14288	2.57154	8.35607
Scf_2L	1960	18776416	2.45424	-2.6298	-3.26931	8.35335
Scf_2L	1797	17301835	-2.35049	2.65374	3.34817	8.3524
Scf_X	1532	19120049	-3.2498	-2.70362	-2.39775	8.35117
Scf_3R	299	3607690	-3.96346	2.39449	1.99313	8.35108
Scf_3R	1145	10716575	-3.56265	-2.94682	1.84049	8.34996
Scf_X	1046	12669048	-3.36664	-2.12233	2.85944	8.34842
Scf_3L	1125	9236601	3.71687	1.8595	2.7718	8.34817
Scf_3L	1713	13996651	4.01612	2.2732	-2.05731	8.34663
Scf_2R	1753	18121039	-2.9047	3.27433	-2.16728	8.34631
Scf_X	1558	19494597	-2.3075	-3.70156	2.33438	8.34344
Scf_3L	1781	14409363	3.3329	2.29561	2.71345	8.34197
Scf_3L	1193	9849109	-2.49293	3.23119	2.6174	8.34152
Scf_2L	463	4720477	-2.4959	3.27457	2.57102	8.34149
Scf_X	874	10820345	1.72358	2.773	-3.84472	8.3413
Scf_3L	502	4467017	2.8318	-2.52113	2.98816	8.34109
Scf_3L	1215	10036165	3.42471	2.37476	-2.54133	8.34081
Scf_2R	957	10375854	1.76385	-2.29366	4.28197	8.33948
Scf_3R	1532	14496928	-2.53283	3.83277	-1.97387	8.33946
Scf_X	0	1842	-2.63786	-2.63959	-3.06174	8.33919
Scf_3R	1798	16381801	2.76644	2.041	3.53167	8.3391
Scf_2L	743	7327565	-2.83625	3.07782	-2.42399	8.33805
Scf_2R	40	586303	-2.24926	2.75901	3.32885	8.33713
Scf_2L	2130	20577463	-2.61843	2.51368	3.20437	8.33648
Scf_2L	598	6074652	2.67191	2.66573	2.99819	8.33583
Scf_3L	1848	15075252	3.3284	-2.95216	2.05471	8.33527
Scf_3L	1417	11469749	-4.16344	-1.85985	-2.309	8.33229
Scf_3R	1077	10206955	2.86731	2.06958	3.39504	8.33193
Scf_3R	470	5207189	3.03987	3.31228	-1.97975	8.3319
Scf_2L	1918	18449577	-2.47885	2.24774	3.60459	8.33117
Scf_3L	1269	10410914	1.96822	-3.25323	3.10944	8.33089
Scf_2L	2044	19724144	-2.69154	-2.34558	3.2933	8.33041
Scf_2R	1100	11596048	3.14343	3.20147	1.98448	8.32938
Scf_3R	281	3355830	1.68905	3.53231	3.10653	8.32788
Scf_2L	2268	22401063	3.49476	2.11594	2.71611	8.32682
Scf_2L	2322	23326545	2.64696	2.98305	2.69565	8.32566
Scf_3L	457	4055197	3.10322	2.42968	-2.79267	8.32558
Scf_X	592	7945232	-3.24317	-2.25128	2.82993	8.32438
Scf_3R	1611	15115422	-2.52285	3.33496	2.46542	8.32324
Scf_3R	290	3528726	3.11306	-2.25784	2.95068	8.32158
Scf_2L	695	7010981	-2.7342	-2.74991	2.83723	8.32134
Scf_2L	597	6067360	2.53284	2.73462	3.04837	8.31583
Scf_2R	1395	14375789	-2.54528	2.90321	2.8662	8.31469
Scf_3R	750	7525475	-2.2102	-2.90073	-3.20332	8.31425
Scf_2L	1303	12451383	2.49465	3.24852	2.57006	8.31324
Scf_2L	2156	20873027	2.61632	3.58487	-2.11164	8.31283
Scf_2L	202	2058889	2.51363	2.40713	3.39131	8.31208
Scf_2R	77	787343	3.47441	-2.45505	-2.38171	8.31118
Scf_X	1218	14722737	3.06801	-2.74788	2.49522	8.31111
Scf_X	829	10388658	-2.47164	2.0323	3.80713	8.31107
Scf_X	1019	12308994	-3.37042	3.08389	1.85498	8.30929
Scf_2R	27	489157	-2.44861	-3.38753	2.4722	8.30834
Scf_X	701	8956708	2.75327	-2.90533	2.64964	8.30825
Scf_2L	792	7691620	3.70988	2.98523	-1.60838	8.30349
Scf_3R	1303	12119889	-3.05738	2.29034	-2.95504	8.30276
Scf_3L	2483	20396662	3.58479	1.81731	2.90056	8.30267
Scf_X	1337	16535274	2.6226	2.76865	-2.91091	8.30216
Scf_2L	1252	12005356	2.66713	2.64425	2.98975	8.30113
Scf_3L	1263	10382348	3.43119	-2.41689	-2.44899	8.29707
Scf_X	1028	12435017	2.92808	2.88443	2.48392	8.29643
Scf_X	1677	20585162	4.18612	2.46653	1.64342	8.29606
Scf_3L	1976	16094797	-2.27919	2.66138	3.35433	8.2949
Scf_3L	2656	22609856	3.63707	2.56146	2.09576	8.29429
Scf_3L	1237	10176680	3.05334	2.733	2.50767	8.29402
Scf_3R	1014	9703219	2.6262	2.47596	3.19165	8.2938
Scf_3R	500	5507418	3.1886	-2.38072	2.72381	8.29314
Scf_3L	2525	20798320	2.8346	2.21773	3.23765	8.28998
Scf_3L	416	3639999	-2.85074	-3.13346	2.30531	8.28951
Scf_3R	40	599133	2.74906	2.55152	2.98785	8.28843
Scf_3R	418	4729767	2.78783	2.45347	3.0465	8.28779
Scf_3R	1870	17189160	-3.23379	-2.27064	-2.78316	8.28759
Scf_3L	2619	22156863	-2.59544	-2.38353	-3.30837	8.28734
Scf_3R	110	1306257	3.61214	-1.9454	2.72855	8.28609
Scf_2L	2209	21626462	2.36136	3.0879	2.8365	8.28577
Scf_3R	2571	24031498	1.84606	4.43722	-2.00121	8.28449
Scf_3R	586	6169478	2.93975	3.39261	1.94924	8.28159
Scf_3R	385	4424997	-2.35318	2.70773	3.22064	8.28155
Scf_3R	1576	14904067	2.11281	-2.67257	3.4961	8.28149
Scf_3R	2776	26005481	2.24557	-2.51449	3.52105	8.2811
Scf_2L	497	5030457	-2.86193	2.4327	2.98581	8.28044
Scf_3L	1205	9972737	-1.93346	3.13743	3.20861	8.2795
Scf_3R	2694	25292376	-2.70318	2.16115	3.41436	8.27869
Scf_2L	2218	21745075	2.69932	-2.41799	3.16126	8.27857
Scf_X	1293	16000080	-2.93583	-2.7234	-2.6177	8.27693
Scf_3L	1142	9384921	-4.05103	-2.2223	-2.00275	8.27607
Scf_X	1107	13223665	-2.88469	-2.47318	-2.91783	8.2757
Scf_3R	2388	21938661	-1.98645	3.05595	3.22748	8.26988
Scf_2R	1745	17997681	-2.57548	2.98173	-2.7112	8.26841
Scf_2R	838	9368158	2.87698	3.45947	-1.93149	8.26795
Scf_3L	1005	8392366	-2.65625	-3.70945	-1.90176	8.26745
Scf_2L	1088	10611627	2.90904	2.33816	3.01996	8.26716
Scf_3R	1709	15873120	-1.91767	-2.63569	-3.71334	8.26671
Scf_3L	2661	22800258	-3.04645	-2.08035	-3.1388	8.2656
Scf_3R	1044	9906680	2.40685	2.36238	-3.49563	8.26486
Scf_X	994	12082963	-1.8274	3.12884	3.30849	8.26473
Scf_3R	1008	9665947	3.70362	2.2999	2.25973	8.26325
Scf_2R	1041	11105977	-2.2727	3.33437	2.65577	8.26283
Scf_3R	1934	17592443	-2.45172	2.642	3.1685	8.26221
Scf_X	465	6682957	2.17028	3.98588	-2.10584	8.26201
Scf_2L	2111	20357647	3.15078	2.7379	2.37086	8.25955
Scf_2R	548	6402327	2.99711	2.71461	2.54673	8.25846
Scf_2L	1170	11393098	2.46095	3.25231	2.54367	8.25693
Scf_2R	539	6287662	2.44715	3.19558	2.61338	8.25611
Scf_3R	102	1218004	2.63324	2.93912	2.68309	8.25546
Scf_2R	1777	18302493	-2.94009	-2.54159	-2.77308	8.25476
Scf_X	1224	14962907	-2.17387	3.04334	3.0355	8.25271
Scf_3L	218	1964187	-3.30162	2.70376	2.24697	8.25235
Scf_2L	583	5917904	-1.94873	-3.51682	2.78674	8.2523
Scf_3L	2476	20328391	-3.07179	2.46747	2.71209	8.25134
Scf_2L	1464	13861083	3.46794	3.09002	-1.69322	8.25117
Scf_3L	1526	12531392	2.40323	2.7014	3.14481	8.24944
Scf_3R	2565	23967846	-3.00953	3.22666	2.01237	8.24857
Scf_2R	907	9999388	2.07869	-2.30003	-3.86965	8.24836
Scf_3L	2325	18906596	3.43439	2.73933	-2.07364	8.24736
Scf_X	1655	20405524	-2.77586	3.14161	-2.3298	8.24727
Scf_2L	492	4974193	2.68096	2.68273	2.88319	8.24688
Scf_3L	1001	8346204	-1.75408	4.11513	-2.37686	8.24607
Scf_X	1313	16205713	2.67475	2.85531	2.71463	8.24469
Scf_3R	773	7618280	2.92755	2.81151	-2.50409	8.24315
Scf_3R	1842	16926831	-2.69811	2.2614	3.28109	8.2406
Scf_X	7	21519	-3.13953	2.30824	-2.79277	8.24054
Scf_3R	1093	10307911	2.31574	2.48028	3.44328	8.23929
Scf_3R	1812	16560653	3.80344	2.37945	-2.05557	8.23847
Scf_2R	275	3148590	-3.05588	-2.40359	-2.77859	8.23807
Scf_3R	1744	16061750	2.70045	2.58482	2.95173	8.237
Scf_2R	251	2857147	-2.69835	-3.39603	-2.142	8.23637
Scf_2L	2226	21856150	1.8873	2.2553	4.09293	8.23553
Scf_3L	1200	9918031	3.05386	-2.09924	-3.08202	8.23512
Scf_2L	195	1986509	3.23863	-2.28285	-2.71328	8.23475
Scf_2L	1215	11793783	3.5741	-2.16383	2.49641	8.23434
Scf_3L	1858	15149534	2.73351	-2.54794	-2.95288	8.23434
Scf_3L	2337	19018324	-2.41162	-2.92809	-2.89344	8.23315
Scf_3L	1468	12003041	-2.04643	3.14356	-3.04305	8.23304
Scf_3R	1503	14199719	2.95808	3.34318	1.93175	8.23301
Scf_3L	1546	12736844	1.99296	2.6474	-3.59254	8.2329
Scf_2L	1802	17438100	-3.10035	2.54898	2.58316	8.2325
Scf_2L	1145	11122262	3.14182	2.58887	2.50167	8.23237
Scf_2L	350	3615621	2.17252	-2.62614	-3.4334	8.23207
Scf_3L	1210	10009731	-2.18399	2.49301	3.55273	8.22973
Scf_3R	69	911121	-2.89808	2.57551	-2.75422	8.22782
Scf_2R	608	7146792	-2.09642	-2.85384	-3.27693	8.2272
Scf_3R	1650	15359824	2.11748	2.52942	3.5793	8.2262
Scf_3L	806	7004145	-2.41093	3.18921	2.62568	8.22583
Scf_3R	1364	12914327	4.24274	2.21148	1.76939	8.2236
Scf_2L	1988	19094829	-3.41091	2.13748	-2.67513	8.22352
Scf_2L	2099	20271170	-3.19325	2.02667	3.00021	8.22014
Scf_3R	464	5186415	2.99421	-3.22409	2.00164	8.21994
Scf_2L	1053	10259823	2.91977	3.1986	2.10082	8.21919
Scf_3L	899	7655944	2.86083	-1.82394	3.53382	8.21859
Scf_X	681	8771129	2.65431	3.4757	2.08822	8.21823
Scf_2L	1086	10585495	1.76706	2.59894	3.85159	8.21758
Scf_3L	767	6702415	2.30052	4.04731	1.86919	8.21702
Scf_3L	2755	24081940	-2.43538	-2.55716	3.22426	8.21679
Scf_3L	1322	10675361	2.66495	2.73435	2.81736	8.21666
Scf_3R	269	3161628	1.98321	2.98691	3.24641	8.21653
Scf_2R	1525	15674206	2.76951	2.31923	3.12746	8.21619
Scf_3L	2700	23367416	2.39924	-1.92725	3.88948	8.21596
Scf_3R	2670	24909824	-3.23596	2.08904	-2.89011	8.21511
Scf_2L	2012	19282713	2.66573	-3.18274	-2.36453	8.21299
Scf_3L	75	713525	1.82521	3.86676	2.52036	8.21234
Scf_3L	1320	10667505	2.42024	-2.35689	-3.43207	8.20921
Scf_3R	130	1517550	3.37025	1.90022	-2.93728	8.20774
Scf_2R	1418	14635151	-2.95663	2.99906	2.25041	8.2061
Scf_3L	1252	10308433	-2.9318	3.68414	1.58982	8.20576
Scf_2R	148	1665562	3.76796	1.67574	2.75999	8.20368
Scf_2L	1209	11766760	3.71972	2.15562	-2.32406	8.1994
Scf_3L	2519	20745293	2.90633	2.90389	2.38899	8.19921
Scf_2L	1920	18457176	2.5952	2.98613	2.61607	8.1974
Scf_3L	2638	22336781	3.23576	-2.34925	2.61205	8.19706
Scf_3R	1920	17510344	-2.76358	2.61625	-2.81637	8.1962
Scf_3L	1211	10018509	-2.69092	-3.68947	-1.81527	8.19566
Scf_3R	2415	22246528	3.71378	2.43952	2.04089	8.19419
Scf_3L	88	875590	2.58842	1.93334	3.67143	8.19319
Scf_3L	480	4278452	-2.85691	-2.49069	2.84549	8.19309
Scf_3R	1931	17571288	-2.23647	2.90654	3.04863	8.19164
Scf_2L	423	4267682	-2.87505	2.76838	2.54637	8.18979
Scf_2L	2331	23411072	-3.00951	-3.05162	2.12794	8.18907
Scf_2R	680	7777039	-2.4845	3.32504	2.37923	8.18878
Scf_3R	2601	24347311	3.33086	-2.7675	-2.09037	8.18873
Scf_2R	21	336282	-2.65685	-2.99755	-2.53105	8.18544
Scf_3L	1594	13217596	2.55885	-2.64439	-2.982	8.18524
Scf_3L	1042	8588333	3.3615	1.78148	3.04121	8.18419
Scf_2R	1458	15053110	-3.55656	1.61614	3.01103	8.18373
Scf_3R	1528	14473111	1.90349	3.09167	3.18703	8.18218
Scf_2L	124	1505287	-1.951	2.30536	3.92572	8.18208
Scf_2L	1287	12297495	2.06133	3.7117	2.40871	8.18174
Scf_3L	2570	21551043	-3.07916	2.41815	2.68415	8.18146
Scf_3R	1196	11217305	3.28349	2.71684	-2.18102	8.18134
Scf_3R	696	7089198	3.18408	-2.72457	-2.2703	8.17894
Scf_3L	1184	9728876	-2.93634	2.81174	-2.43037	8.17845
Scf_2L	304	3118180	2.71581	2.34291	3.11927	8.17799
Scf_2L	1683	16066056	2.65666	2.70928	-2.81045	8.17639
Scf_2L	2337	23447217	-2.92266	-2.52225	-2.73113	8.17604
Scf_3R	969	9317594	-3.04779	3.0792	-2.04797	8.17496
Scf_2R	103	1148587	-2.4457	-2.37934	-3.34957	8.1746
Scf_X	770	9721035	1.9319	3.39231	2.85016	8.17438
Scf_3L	2228	18169649	3.25005	3.32109	1.60316	8.17431
Scf_3R	1351	12736081	2.39055	-2.52445	3.25883	8.17384
Scf_2R	1097	11566822	-2.40486	3.27828	2.49013	8.17327
Scf_2R	26	483534	-2.18438	-3.011	-2.97477	8.17015
Scf_3L	845	7269224	2.24342	2.92204	3.00272	8.16819
Scf_3L	1219	10060138	1.84143	-2.87322	3.45223	8.16688
Scf_3R	1092	10303726	2.08141	3.50664	2.57865	8.1667
Scf_X	1418	17523584	-2.8688	3.1725	2.12487	8.16617
Scf_3R	1471	13915036	-2.32755	4.05933	-1.778	8.16487
Scf_3L	950	7903230	1.53902	2.91345	3.71213	8.1646
Scf_2L	1570	14929547	-2.6932	-2.63536	-2.83364	8.1622
Scf_X	281	4619638	3.43362	-2.32586	2.4004	8.15989
Scf_X	1196	14434830	-2.72007	-2.50906	-2.93005	8.15918
Scf_X	517	7267444	2.66416	2.67524	2.81973	8.15913
Scf_3R	873	8445173	2.55574	2.87694	-2.72349	8.15617
Scf_3L	2540	21062461	3.58493	1.70073	2.86884	8.1545
Scf_X	1072	12895366	-2.77556	3.10574	-2.27299	8.15429
Scf_2L	2154	20863486	-2.97992	-2.04935	-3.12189	8.15116
Scf_2R	833	9309641	3.61305	-2.18746	2.35048	8.15099
Scf_2L	529	5280782	-2.22213	-2.2821	-3.64672	8.15095
Scf_2R	1131	11960924	2.28051	3.33888	2.52885	8.14823
Scf_3L	2257	18357424	-2.06501	-2.87425	3.2085	8.14776
Scf_3R	297	3582683	2.71912	2.76914	2.65894	8.1472
Scf_2R	162	1795882	-2.29549	-2.98548	-2.86505	8.14602
Scf_2L	506	5096914	-2.26249	2.86664	3.01592	8.14505
Scf_3L	908	7693391	2.45876	-3.01722	-2.66904	8.14502
Scf_3L	1887	15381713	2.62281	1.48069	4.04049	8.14399
Scf_3R	2097	19248304	-3.00079	-2.3871	2.75572	8.14361
Scf_X	1560	19545506	-2.35319	3.41587	-2.37438	8.14344
Scf_2L	365	3714052	-2.37464	2.49666	3.27175	8.14305
Scf_3R	793	7761502	-3.04831	2.33783	2.7544	8.14054
Scf_2L	2243	22122918	-2.5455	-2.90534	-2.68803	8.13888
Scf_3L	1204	9962976	-2.34425	-2.93873	2.85575	8.13873
Scf_3R	231	2747123	-4.19772	-1.79646	2.14436	8.13854
Scf_X	1131	13609810	-1.82003	3.78559	2.53288	8.1385
Scf_X	262	4424666	2.23679	2.92902	2.9726	8.13841
Scf_3R	932	9018071	-2.87171	-2.41238	2.85359	8.13768
Scf_2L	13	349873	-2.37369	-2.9898	2.77333	8.13681
Scf_3R	715	7226912	3.08806	2.70331	2.34486	8.13623
Scf_2L	1016	9691099	2.74245	2.33305	3.05999	8.13548
Scf_3R	30	504628	2.36891	2.7499	3.01596	8.13477
Scf_3R	914	8879097	2.6016	2.71356	-2.81931	8.13448
Scf_2L	2165	20974472	-2.61742	-2.67451	-2.84108	8.13302
Scf_2L	384	3890040	2.93869	-2.35422	2.84002	8.13293
Scf_3L	657	5748151	2.00767	-1.64182	4.48155	8.13104
Scf_3R	1604	15062806	2.77605	2.88796	2.46651	8.13052
Scf_3R	2790	26181746	-1.94583	2.99417	-3.19043	8.13043
Scf_2L	1810	17554402	-2.07089	-1.9734	4.08603	8.13032
Scf_2L	1419	13540561	2.21023	3.42768	2.49096	8.12887
Scf_2R	1843	19095867	-2.58767	-2.69887	-2.84232	8.12887
Scf_3R	879	8507033	-2.34672	3.4051	-2.37486	8.12668
Scf_3L	645	5639490	2.71004	2.22756	3.189	8.1266
Scf_3L	1945	15822612	-2.25277	3.16984	-2.70212	8.12473
Scf_3R	2745	25729609	3.0324	2.54799	2.54433	8.12471
Scf_3R	1296	12059356	3.34892	-2.24832	-2.52643	8.12367
Scf_3R	311	3767924	3.90282	-2.01465	-2.20563	8.1231
Scf_X	1663	20486017	-2.89927	-2.94452	-2.27897	8.12276
Scf_2L	1248	11976322	2.85576	2.32528	2.94144	8.12248
Scf_3R	597	6249288	2.00663	3.91822	2.19684	8.1217
Scf_3R	407	4670116	-2.8344	-3.19889	2.08831	8.1216
Scf_X	427	6157260	3.81468	-1.95119	2.35431	8.12018
Scf_2L	1637	15811879	-2.08986	-2.75336	-3.27651	8.11973
Scf_3L	1327	10729613	2.49502	3.55761	2.06706	8.11969
Scf_3L	1506	12379607	2.80416	2.82085	2.4944	8.11941
Scf_2L	342	3534754	2.84254	2.22073	3.05426	8.11752
Scf_3R	2110	19333358	2.98733	2.61354	2.51648	8.11735
Scf_3R	1295	12041173	2.60608	2.86321	2.64789	8.11719
Scf_3L	494	4398852	2.66969	-2.5736	2.87275	8.11604
Scf_2L	2247	22148924	-2.49202	-3.16826	-2.45524	8.11552
Scf_3R	53	730767	-2.2509	2.49237	-3.37184	8.11511
Scf_3R	1638	15292864	3.26212	-2.69232	2.16045	8.11488
Scf_2L	2233	22034737	2.1983	2.19116	3.72471	8.11416
Scf_X	1483	18563668	-2.83371	-3.2686	-2.01009	8.1124
Scf_3R	1757	16124760	1.97379	3.61437	2.52387	8.11203
Scf_2L	2142	20728669	-1.73539	-2.04664	-4.32912	8.11116
Scf_2L	369	3747476	2.77193	2.79381	2.54498	8.11072
Scf_X	1248	15459093	3.94692	1.5664	2.59384	8.10717
Scf_3L	2533	20891042	3.46929	2.65933	-1.97838	8.107
Scf_3R	598	6267037	2.95547	2.05505	3.09622	8.10675
Scf_2L	2190	21377506	2.41784	-3.32028	2.36642	8.10454
Scf_X	647	8352909	2.58553	3.16651	2.35151	8.10355
Scf_3R	2143	19589674	-2.52516	2.58765	-2.98969	8.10249
Scf_3L	2009	16384342	2.82736	2.27687	-2.99763	8.10186
Scf_3R	56	767839	2.24967	-2.84227	3.0085	8.10044
Scf_3L	1639	13632907	-2.98884	2.13476	2.97589	8.09949
Scf_3L	1876	15316704	2.78997	3.16576	2.1431	8.09884
Scf_3R	1805	16474351	-3.34796	-2.20849	2.54153	8.09799
Scf_2R	922	10112989	-3.06245	2.74691	2.28841	8.09777
Scf_X	1534	19123695	-3.48393	-2.38046	-2.23326	8.09765
Scf_3R	386	4435064	3.05227	-2.38621	-2.65776	8.09625
Scf_3R	1342	12619943	2.02871	2.98116	3.08566	8.09553
Scf_3R	1350	12724103	3.14133	-2.28041	2.67189	8.09362
Scf_2L	808	7877081	4.04637	-1.98356	-2.06273	8.09265
Scf_3L	1360	11003189	-3.66875	-2.22326	2.19907	8.09108
Scf_X	1496	18675066	3.38797	2.60388	-2.09785	8.08971
Scf_3L	498	4437449	2.34684	2.93084	2.81134	8.08903
Scf_X	1484	18566478	-2.87619	-2.58996	-2.62282	8.08897
Scf_3R	816	7890458	4.16538	2.28137	1.64127	8.08803
Scf_2L	1191	11564307	-2.63733	1.92093	3.52878	8.08705
Scf_2L	1795	17267240	2.81685	2.68934	2.58059	8.08677
Scf_3R	891	8625800	2.98752	2.6741	-2.42441	8.08603
Scf_3L	1333	10784411	3.64671	-2.01194	-2.42668	8.08532
Scf_3R	2817	26665364	3.80124	2.16819	-2.11506	8.0845
Scf_3R	196	2398187	2.57945	2.15626	-3.34754	8.08326
Scf_2L	231	2363698	2.13582	3.95442	-1.99289	8.08313
Scf_2L	551	5510888	2.57093	3.29667	-2.21385	8.08145
Scf_3L	1458	11916678	2.85454	-2.68281	2.54329	8.08063
Scf_2L	2291	22851492	-2.36997	-2.651	-3.05841	8.07938
Scf_3R	1962	17824113	3.35543	2.56522	2.15756	8.07821
Scf_2R	1460	15092258	-2.41051	-2.29731	-3.3701	8.07791
Scf_3R	2262	20773609	-2.21511	3.57156	2.29099	8.07767
Scf_3L	2017	16456329	-2.45519	-2.89826	2.72418	8.07763
Scf_3R	1209	11321412	2.27254	-3.28079	2.52417	8.07749
Scf_X	502	7092204	3.09926	-2.61593	-2.36201	8.0772
Scf_3L	2242	18276871	-2.25852	3.80269	-2.01592	8.07712
Scf_2L	2203	21526136	-1.9401	2.57397	3.56174	8.07582
Scf_3R	337	3922721	2.7875	-2.41788	2.8695	8.07488
Scf_2R	783	8682792	2.0663	3.14599	2.86231	8.0746
Scf_2L	1652	15862431	-2.36532	3.73623	1.9723	8.07385
Scf_3R	1075	10152518	-3.85886	2.2831	1.93163	8.07359
Scf_2R	320	3601807	2.78995	-2.49626	2.78501	8.07122
Scf_2R	1809	18667208	-2.62272	2.72094	2.7259	8.06955
Scf_2L	1147	11129568	2.29373	-2.75662	3.01803	8.06837
Scf_3R	1551	14727670	-2.13993	-3.78775	2.14013	8.0678
Scf_X	213	3820127	-3.35022	-2.22333	-2.49339	8.06693
Scf_3L	1059	8711328	2.37882	2.31422	3.37387	8.06691
Scf_X	1536	19172227	3.37257	2.31121	2.38215	8.06593
Scf_3R	1608	15089978	2.45997	-3.13239	2.47271	8.06507
Scf_X	1606	20154249	-2.51506	-2.71354	2.8357	8.06429
Scf_3R	1278	11857612	-2.27271	2.32441	3.46645	8.06357
Scf_3L	627	5529040	-3.24711	2.69535	2.11952	8.06198
Scf_3R	1067	10101860	2.26938	3.81897	-1.9736	8.06194
Scf_3R	1450	13736104	-2.12396	3.52816	2.40916	8.06127
Scf_3R	131	1527435	3.22692	1.97916	-2.8551	8.06119
Scf_2L	297	3013617	2.65565	3.07006	-2.33545	8.06115
Scf_2L	939	8983492	3.48545	2.75465	1.82096	8.06106
Scf_3R	1885	17288119	1.90511	4.0444	2.11107	8.06057
Scf_3L	1453	11853586	-2.28721	3.9661	-1.80711	8.06042
Scf_2L	1110	10816899	3.42265	2.17368	2.4624	8.05873
Scf_3R	544	5875519	3.63793	2.26657	2.15421	8.05871
Scf_3L	2404	19650357	-2.02224	2.73895	-3.29558	8.05678
Scf_3R	2043	18670254	-2.9512	-2.28826	2.81478	8.05423
Scf_3R	754	7545093	1.76846	-3.47462	-2.81084	8.05392
Scf_2R	1404	14454879	2.61398	2.75249	2.68699	8.05346
Scf_3R	1949	17687175	2.30034	-3.12778	2.62417	8.05229
Scf_2R	1791	18435674	-2.83367	-2.57957	2.63898	8.05222
Scf_3R	1828	16725801	2.98426	2.4763	2.59022	8.05078
Scf_3R	2188	19955223	2.34932	2.6813	3.01914	8.04975
Scf_3R	1428	13477778	2.79659	2.33709	2.91552	8.04921
Scf_3R	915	8882673	2.52707	2.66535	-2.85667	8.04909
Scf_3R	300	3614906	-3.63113	1.98425	2.43346	8.04883
Scf_2L	822	7995372	3.38769	-2.00289	-2.65816	8.04874
Scf_2L	2213	21682480	2.622	-3.44385	-1.9813	8.04714
Scf_2L	1557	14721422	-2.91118	3.1716	-1.96408	8.04687
Scf_3L	310	2764017	2.29867	2.45574	-3.29132	8.04572
Scf_2R	1272	13272187	-3.37392	2.58201	2.0895	8.04543
Scf_2L	2289	22827187	-2.36332	-2.90432	-2.77592	8.04356
Scf_3L	1374	11102421	2.31688	2.69534	-3.03033	8.04256
Scf_3R	706	7175180	3.91319	1.97711	-2.15224	8.04254
Scf_2R	252	2857675	2.72414	-3.34518	1.97299	8.04231
Scf_3L	959	7987947	3.09207	3.29154	1.65624	8.03986
Scf_3R	1711	15893672	-2.76105	-2.68506	-2.59307	8.03918
Scf_3L	1220	10067300	2.28545	3.91612	1.83737	8.03894
Scf_3R	842	8229787	-2.08606	3.68717	-2.26568	8.03891
Scf_3L	1087	8933444	1.82412	3.1033	3.11062	8.03803
Scf_3R	135	1599826	2.00192	2.69628	-3.33955	8.03775
Scf_2R	826	9197647	-2.21271	-2.20823	-3.61648	8.03741
Scf_3R	2567	23978617	-2.39501	3.7907	1.85139	8.0371
Scf_2L	250	2563142	-2.87258	-3.08759	2.07675	8.03692
Scf_3R	105	1231655	3.56264	2.4852	-1.98825	8.03609
Scf_3L	1926	15677681	-3.10955	2.64846	2.27794	8.03595
Scf_2L	2175	21171817	-2.27521	-2.91379	2.84574	8.03474
Scf_2L	1014	9676642	-3.11869	2.98974	-1.92432	8.03276
Scf_3R	1052	9983764	2.55893	2.73952	-2.73285	8.03129
Scf_3L	2073	16838100	2.25132	1.96732	3.81242	8.03105
Scf_3L	816	7054171	2.65453	3.18494	2.18973	8.0292
Scf_3R	1752	16103096	-1.91625	-2.92059	-3.18983	8.02667
Scf_3R	946	9134311	-1.61028	-3.11395	3.301	8.02522
Scf_2R	1735	17894480	-2.75063	-1.9716	-3.30138	8.02361
Scf_3L	2576	21610654	2.11175	-2.97822	2.9328	8.02277
Scf_2L	1816	17656120	-2.68865	-2.51813	-2.81568	8.02246
Scf_2R	151	1683032	-2.98103	-2.30834	-2.73262	8.02199
Scf_X	555	7688378	-3.06614	-2.09213	2.8626	8.02086
Scf_3R	617	6440726	3.40317	-1.63625	2.98067	8.02009
Scf_3R	1301	12102455	3.64965	2.43554	1.93408	8.01926
Scf_2R	1156	12199470	3.04396	2.73719	2.23771	8.01886
Scf_2L	617	6323886	2.85232	2.41532	2.74958	8.01723
Scf_3L	212	1941562	3.20027	-1.96077	2.85464	8.01568
Scf_3R	268	3146983	2.7218	3.70518	1.58831	8.01529
Scf_3R	604	6323486	4.30069	-1.56507	-2.14946	8.01522
Scf_3L	1011	8431878	3.58102	2.60151	1.83192	8.01446
Scf_3R	1986	18059967	3.56296	1.55919	2.89227	8.01442
Scf_2L	210	2152246	1.80742	2.75039	3.45612	8.01393
Scf_3R	1081	10241867	3.35239	1.56273	3.09673	8.01185
Scf_3L	2386	19452183	-2.54002	-2.24899	3.2226	8.01161
Scf_3R	2331	21391192	3.06172	2.151	2.79812	8.01084
Scf_2R	1346	13865938	3.144	2.11177	2.75488	8.01065
Scf_2L	252	2593971	-2.40073	-3.43438	-2.17493	8.01004
Scf_X	1618	20225889	-3.00204	2.98361	-2.02427	8.00992
Scf_3R	886	8582503	3.43368	2.51991	2.05622	8.00981
Scf_3R	2710	25451302	-2.15679	3.3253	2.52756	8.00966
Scf_2L	727	7246873	2.85671	2.26626	2.88629	8.00926
Scf_3R	688	7019323	-2.87078	1.72404	3.41414	8.00896
Scf_2L	179	1824865	3.21703	2.70905	2.08195	8.00804
Scf_3R	2841	26973494	-3.01639	2.69811	2.29265	8.00715
Scf_3R	2809	26486575	2.58076	3.18218	2.24378	8.00672
Scf_X	194	3524389	-4.42019	-1.97215	-1.61389	8.00622
Scf_3L	1528	12561006	2.92031	1.83051	3.25421	8.00503
Scf_X	265	4475095	-3.09637	-2.94719	1.96062	8.00418
Scf_3R	148	1883645	1.934	-2.76854	3.29977	8.0023
Scf_X	136	2889531	-2.61535	2.73136	-2.65416	8.00087
Scf_2R	116	1242822	-3.46436	-2.2631	-2.27149	7.99895
Scf_3R	955	9210354	-2.89552	-2.45113	-2.65135	7.99801
Scf_X	1035	12507941	-2.45872	-2.411	-3.12807	7.9978
Scf_X	1185	14277434	2.83045	2.37379	2.79333	7.99757
Scf_3R	115	1366475	3.44036	-2.14542	2.41095	7.99673
Scf_2R	1327	13724384	-2.64057	-2.83832	2.5171	7.996
Scf_2R	1028	10984721	-2.77621	2.64958	2.56761	7.9934
Scf_2R	1752	18117422	-2.83878	-2.88926	2.26299	7.99104
Scf_2R	167	1883313	-3.30241	-2.24713	-2.44013	7.98967
Scf_X	284	4643766	3.01513	2.43877	2.53518	7.98908
Scf_2R	505	5974521	-3.28981	-1.72664	2.96905	7.9855
Scf_2R	46	625539	-3.35214	2.10052	-2.53222	7.98489
Scf_3L	1158	9512016	1.97555	2.54713	3.46197	7.98465
Scf_2R	249	2828429	-2.86449	-2.25333	-2.8668	7.98462
Scf_3R	340	3931929	3.64968	-1.9806	2.35399	7.98427
Scf_3R	1536	14577554	-1.86978	4.10469	-2.00885	7.98332
Scf_2R	1682	17334312	3.1136	2.14059	2.72865	7.98284
Scf_3L	2652	22420683	-2.05295	-2.83001	-3.09912	7.98208
Scf_2L	1356	12981286	-2.8437	2.60539	-2.53294	7.98203
Scf_X	1179	14190035	2.49926	1.89079	-3.59175	7.9818
Scf_2R	142	1558989	3.2663	2.99501	-1.72018	7.98149
Scf_3R	497	5476561	-2.32467	2.40603	3.25008	7.98078
Scf_2R	699	7965988	-2.037	4.17632	1.76538	7.9787
Scf_X	198	3608249	2.97432	-2.70773	2.29638	7.97842
Scf_3L	691	6088995	3.05592	2.12043	2.80191	7.97826
Scf_2L	1978	18968931	-2.45196	2.95551	2.56972	7.97719
Scf_2L	1664	15937335	1.85376	1.72706	4.39535	7.97617
Scf_3R	2133	19497526	-1.93472	3.30803	2.73289	7.97564
Scf_3L	916	7737990	-2.48815	-2.86746	-2.61921	7.97483
Scf_2L	18	439793	-2.12303	2.55883	3.29276	7.97462
Scf_2L	2280	22734225	-3.42571	-2.01264	-2.53623	7.97457
Scf_3R	928	8971867	-3.20185	-2.54067	-2.23193	7.97445
Scf_2L	1137	11043850	2.13053	-3.18817	-2.65414	7.97284
Scf_2R	8	96631	2.17486	-2.34771	-3.44987	7.97245
Scf_2R	1789	18413992	2.62139	2.65239	2.69864	7.97242
Scf_X	1542	19269024	2.74885	2.23958	2.98392	7.97236
Scf_X	190	3441086	-4.36529	-1.93313	-1.67309	7.97152
Scf_3R	1168	10922429	2.03171	3.22701	2.71007	7.96879
Scf_3R	2529	23534348	2.47465	-1.96956	3.52348	7.96769
Scf_3L	1939	15787895	3.4729	2.27894	-2.21572	7.96757
Scf_2L	650	6674503	2.49244	-2.40036	3.07378	7.96658
Scf_X	1067	12867430	1.99302	-3.70728	2.26472	7.96501
Scf_2R	1515	15608660	3.14278	-1.62096	3.20105	7.96479
Scf_2L	1671	15988823	1.94541	4.07031	1.94895	7.96466
Scf_3R	1851	17006249	1.88367	3.2555	2.82472	7.9639
Scf_2L	370	3761966	2.95876	-2.10685	-2.89814	7.96374
Scf_2R	226	2539136	-2.42813	-3.34243	-2.19312	7.96368
Scf_X	1200	14441619	-2.72663	-3.36773	-1.86786	7.96223
Scf_3L	2709	23420693	2.62904	-2.9578	-2.37504	7.96189
Scf_3L	275	2470422	2.11546	-3.14601	2.70002	7.96148
Scf_X	1442	17876789	2.41673	3.50185	2.04234	7.96091
Scf_3R	832	8070237	3.00649	-2.68074	2.27362	7.96085
Scf_2R	146	1649767	-3.22647	-2.25246	-2.48181	7.96074
Scf_X	727	9314773	2.75416	-3.00954	2.19579	7.95949
Scf_X	388	5698818	-2.34637	-2.86247	2.75054	7.95938
Scf_3L	389	3467924	-3.05164	-2.46658	2.44062	7.95885
Scf_2L	523	5242191	-2.56502	-2.55864	2.8349	7.95856
Scf_X	34	919006	3.15321	2.50726	2.29658	7.95705
Scf_3L	772	6726416	1.64329	2.24163	-4.07198	7.95691
Scf_2L	949	9097573	2.39955	3.33541	2.22184	7.9568
Scf_2L	564	5658912	2.13974	2.62947	3.1866	7.95581
Scf_2L	1462	13852762	-1.97789	3.86791	2.1096	7.95539
Scf_3R	517	5683413	2.74991	2.92894	2.27609	7.95495
Scf_2R	589	6983955	2.92958	2.89375	2.13116	7.9545
Scf_X	941	11697127	2.50184	2.87536	2.57725	7.95445
Scf_3L	1514	12470371	-2.1545	3.16059	2.63891	7.95401
Scf_2R	602	7080107	2.94133	-2.70243	-2.30967	7.95343
Scf_3L	1507	12387698	-2.67598	2.75898	-2.51782	7.95277
Scf_3L	2287	18581488	2.9785	2.54022	-2.43396	7.95268
Scf_3L	2076	16868381	2.34945	2.46708	-3.13566	7.95218
Scf_3R	608	6351413	-3.43821	2.50632	-2.00607	7.95061
Scf_2L	555	5536626	-2.197	1.83228	3.92121	7.95049
Scf_2R	1800	18552102	1.99113	2.58994	-3.36935	7.95041
Scf_2L	1886	18252248	2.61199	-2.35187	2.98399	7.94784
Scf_3L	2346	19104764	3.25228	2.27616	2.41915	7.94759
Scf_2L	802	7809853	-2.21527	-3.18427	-2.54789	7.94743
Scf_2R	1796	18487606	-2.36814	2.15987	3.41932	7.94733
Scf_2L	940	8992972	-3.26026	2.98779	-1.69867	7.94672
Scf_3R	543	5869853	3.11926	2.79908	2.0275	7.94583
Scf_2L	785	7672269	3.18224	2.4348	2.3275	7.94455
Scf_3L	148	1395209	-2.61157	2.48304	2.84954	7.94415
Scf_2R	1140	12037544	2.84183	2.62129	2.47993	7.94305
Scf_X	1683	20716496	-3.61256	-2.00369	-2.32633	7.94258
Scf_3R	1906	17399051	3.12089	2.19479	2.62684	7.94251
Scf_2R	1325	13712143	2.29493	-2.96285	2.68321	7.94099
Scf_3R	2176	19870160	2.7954	2.63263	2.51066	7.93868
Scf_2R	9	105623	2.31841	3.28338	-2.33611	7.93791
Scf_2L	2161	20919561	-2.78284	-2.76811	-2.3866	7.93754
Scf_2R	1266	13236040	3.1123	2.06439	-2.76051	7.9372
Scf_2L	1015	9683014	2.26533	-2.55515	-3.11475	7.93522
Scf_2R	1069	11328900	2.30578	3.14516	2.48323	7.93417
Scf_3L	2317	18843219	3.75002	1.94219	2.24103	7.93324
Scf_3L	2545	21161065	3.18724	1.72932	-3.01664	7.9332
Scf_2L	2338	23447336	-2.61832	-2.58723	-2.72753	7.93308
Scf_2L	1809	17527955	-2.4565	-2.92074	-2.55572	7.93297
Scf_3R	828	8034804	2.91811	2.36923	2.64525	7.93259
Scf_2R	197	2177488	-2.74629	2.49222	-2.6937	7.93221
Scf_2L	1517	14419546	-2.94024	2.86695	-2.12348	7.93067
Scf_3L	1341	10858862	3.21146	-2.74694	1.97061	7.92902
Scf_X	233	4063222	-2.62946	2.65147	2.64801	7.92894
Scf_2L	1295	12369385	2.28362	-3.24178	2.40323	7.92863
Scf_3R	476	5244161	3.31138	2.12679	2.48948	7.92766
Scf_2L	17	420682	2.64789	-1.65616	3.62332	7.92738
Scf_3R	2370	21801911	2.67098	2.39869	-2.85405	7.92372
Scf_X	1277	15818976	-3.18502	-2.65233	-2.08561	7.92296
Scf_2R	1978	21074989	2.46386	2.66448	-2.79419	7.92252
Scf_3R	602	6292761	3.62918	-1.91929	2.37398	7.92245
Scf_X	775	9810426	3.12037	-2.38761	-2.41387	7.92186
Scf_3L	134	1271882	1.94944	2.66869	3.30332	7.92145
Scf_X	193	3501004	-2.81822	2.74629	2.35681	7.92131
Scf_3R	988	9472946	-2.69145	2.73712	2.49226	7.92084
Scf_X	929	11516493	2.49301	-1.77939	3.64832	7.92073
Scf_3L	2535	20918504	3.50695	-2.06304	-2.35043	7.92042
Scf_2L	204	2077337	-2.21934	-2.58777	-3.11305	7.92017
Scf_3R	416	4725149	-1.62887	3.31097	2.98027	7.9201
Scf_X	1405	17335711	-2.58762	-1.44696	-3.88503	7.91961
Scf_X	571	7812870	-2.35163	3.80574	1.76218	7.91955
Scf_2L	461	4696134	2.09626	-2.90252	2.92055	7.91934
Scf_3L	379	3433249	2.67799	3.42457	-1.81607	7.91863
Scf_2R	1922	20188922	2.44857	3.17545	2.29415	7.91817
Scf_3L	2723	23704525	-2.50188	-2.69242	-2.72291	7.91722
Scf_2L	1003	9544959	3.02388	-2.85601	2.03696	7.91685
Scf_2R	135	1443664	2.20334	-3.23459	-2.47625	7.91418
Scf_3R	919	8911761	2.40986	3.4314	-2.07279	7.91406
Scf_2L	1384	13176995	3.06187	-2.83167	-2.01989	7.91344
Scf_3R	2076	19008848	1.6126	2.9425	3.35716	7.91226
Scf_2L	2075	20030799	2.46448	2.8507	2.5969	7.91209
Scf_2R	298	3332298	-2.58028	2.20699	3.12463	7.91191
Scf_3L	2379	19380751	3.67763	-2.59236	-1.64147	7.91145
Scf_3R	836	8120053	2.81527	3.11327	-1.98217	7.9107
Scf_2L	711	7100649	3.06331	2.34169	2.50508	7.91007
Scf_3L	971	8091886	-1.71698	3.56743	2.62542	7.90983
Scf_3L	2480	20357163	2.28429	2.77879	-2.84595	7.90904
Scf_X	1667	20515490	-3.49054	-2.67476	-1.74363	7.90894
Scf_2L	1697	16157439	2.46663	-2.28246	3.15954	7.90863
Scf_2L	240	2428593	3.17664	-2.3584	2.37342	7.90846
Scf_3L	1209	9996725	-2.83118	2.10742	2.96963	7.90824
Scf_2L	1670	15983357	2.36312	3.24545	2.29877	7.90734
Scf_2L	710	7093159	3.66706	-1.94494	-2.29529	7.9073
Scf_X	1648	20348978	-1.6115	2.65922	-3.63655	7.90727
Scf_3L	2120	17249196	-2.55242	3.18388	2.17085	7.90715
Scf_2L	1597	15258481	-2.9149	-2.77705	2.21505	7.907
Scf_2R	493	5818405	2.88715	2.37467	2.64492	7.90674
Scf_2L	1780	16985969	3.04031	-2.78192	2.0843	7.90653
Scf_2R	1261	13178114	-3.59435	-2.50211	1.80987	7.90633
Scf_2R	1557	15916132	2.84923	2.55007	2.50671	7.906
Scf_3L	2544	21142732	3.32779	-1.66083	2.91712	7.90574
Scf_2R	1510	15551459	-2.99954	2.10683	2.79927	7.90564
Scf_3R	2195	20010941	-2.50542	-3.63273	1.76691	7.90506
Scf_X	363	5415974	2.41244	-2.09867	3.39184	7.90294
Scf_3R	2518	23415882	2.67392	3.0192	2.20931	7.90244
Scf_2R	244	2787387	-2.79917	-2.38425	2.71828	7.9017
Scf_X	1257	15516555	1.95254	-3.26375	2.68502	7.90131
Scf_3R	17	278094	-2.46889	-3.15043	-2.28051	7.89983
Scf_2L	276	2806884	-2.02698	2.15137	3.72075	7.8991
Scf_3L	1315	10608386	1.81783	3.78018	2.30005	7.89806
Scf_2L	140	1572782	-3.25595	2.33084	-2.31034	7.89712
Scf_3R	1916	17473492	2.4504	-2.14168	3.30498	7.89705
Scf_3L	981	8195593	-1.83777	2.9671	3.09123	7.89609
Scf_3L	955	7952680	-2.22762	3.12571	2.54023	7.89356
Scf_3R	157	2060705	-2.63295	2.59511	2.66547	7.89354
Scf_3R	2300	21118874	-2.48776	2.84591	2.55983	7.8935
Scf_X	640	8307690	-3.04859	-2.22769	-2.61679	7.89306
Scf_3L	1485	12165015	-3.31605	2.19697	2.37989	7.8929
Scf_2L	194	1967257	2.7495	2.11549	3.02758	7.89257
Scf_3R	1103	10400036	2.23837	3.54373	-2.11037	7.89247
Scf_X	588	7906074	2.41164	2.77709	2.70364	7.89237
Scf_3R	2378	21836528	-2.40134	2.15423	3.33673	7.8923
Scf_3R	1797	16372917	2.70083	-2.29085	2.9001	7.89179
Scf_3R	913	8870817	2.49333	-2.57837	2.81954	7.89124
Scf_3R	1173	10972371	2.18769	3.6147	2.08792	7.8903
Scf_X	674	8683830	-1.92995	-3.29887	2.66087	7.8897
Scf_3R	2805	26423714	2.90652	2.60625	2.37654	7.88931
Scf_2R	276	3149893	-2.09092	2.39584	-3.40235	7.88911
Scf_2R	229	2581660	2.77291	-2.61958	-2.49651	7.889
Scf_3L	2664	22868663	-2.51643	3.22343	2.14801	7.88787
Scf_3L	2362	19214090	2.62522	3.00573	2.25589	7.88684
Scf_X	539	7544831	-2.28365	-2.19706	3.40482	7.88553
Scf_3R	2268	20831499	-1.95803	3.0495	2.87746	7.88499
Scf_3R	12	199325	-3.31584	2.73982	-1.82925	7.88492
Scf_2R	1879	19514110	3.28149	2.35723	2.24558	7.8843
Scf_3R	1305	12136602	2.56446	3.04597	-2.27379	7.88422
Scf_3L	1132	9290283	-2.17161	2.17006	-3.54172	7.88338
Scf_3R	1130	10646250	-2.78697	-2.20631	2.88904	7.88232
Scf_2R	1527	15681223	-2.73691	2.43468	2.7097	7.88129
Scf_3R	2202	20043858	3.03105	2.50294	-2.34668	7.88067
Scf_3L	1651	13698835	-3.03258	2.02587	2.82085	7.87931
Scf_3R	709	7188183	-2.38005	-2.90541	-2.59363	7.87909
Scf_3L	2753	24061761	2.59017	3.31823	1.97063	7.87902
Scf_2L	415	4170637	-3.10825	-2.22444	2.54601	7.8787
Scf_3R	2581	24134323	2.48397	3.13229	2.26205	7.87831
Scf_3R	896	8692530	-3.53781	-2.87455	-1.46591	7.87828
Scf_2R	45	625477	2.85806	2.53462	2.48511	7.87779
Scf_2L	1800	17387639	-2.14151	2.7462	-2.98923	7.87693
Scf_2L	173	1801974	-2.17686	-3.61477	2.08506	7.87669
Scf_3L	2216	18055036	3.23814	-2.50347	2.13507	7.87668
Scf_3R	722	7298310	3.18284	2.52376	2.17002	7.87663
Scf_3R	2607	24394261	-1.87754	-2.24975	3.74893	7.87622
Scf_X	101	2490089	-2.0451	2.68385	-3.14517	7.87413
Scf_3R	1513	14303236	2.9118	2.42849	2.53371	7.87401
Scf_3L	1354	10939263	3.19646	2.46544	2.21155	7.87345
Scf_2L	1011	9657735	3.67361	2.05329	-2.14571	7.87261
Scf_3R	2428	22417996	-2.41185	-2.85397	-2.60634	7.87217
Scf_3R	1050	9974573	2.21042	-2.88097	2.78028	7.87167
Scf_3R	1040	9840051	2.89525	2.85868	2.11624	7.87017
Scf_3L	2554	21277038	2.68825	-1.61356	-3.56812	7.86993
Scf_3R	2622	24511924	-2.37335	-2.17523	-3.32069	7.86927
Scf_3R	1864	17124099	1.57209	4.20111	2.09592	7.86912
Scf_3L	778	6757706	-2.78974	2.35071	2.72816	7.86861
Scf_2L	329	3427328	2.30873	3.2527	-2.30616	7.86758
Scf_3L	418	3647962	1.87473	2.08098	3.91022	7.86593
Scf_3R	2541	23659429	3.26046	2.78014	1.82489	7.86548
Scf_3R	2095	19236136	2.80067	1.95011	3.11467	7.86545
Scf_X	1027	12429456	2.10056	3.36177	-2.40298	7.86531
Scf_3L	114	1057014	2.10461	2.3297	3.43041	7.86472
Scf_3L	2	27229	-3.56841	-2.27281	-2.02219	7.86341
Scf_X	706	9085276	-1.96991	-2.43413	-3.45835	7.86239
Scf_X	1390	17128451	2.94604	-2.5872	-2.3291	7.86235
Scf_3R	1935	17598875	-2.44015	-2.28019	3.14138	7.86172
Scf_2R	1991	21365532	-3.37624	2.17462	-2.31068	7.86154
Scf_3L	1397	11285677	-2.62214	-2.80649	2.43275	7.86138
Scf_X	1688	20765302	2.27914	-2.85168	2.73041	7.86123
Scf_X	296	4741885	3.14894	2.76156	1.94945	7.85994
Scf_3R	714	7217627	2.81651	3.19802	1.84533	7.85987
Scf_X	1102	13181998	-3.05247	-2.26275	-2.54354	7.85876
Scf_2L	2126	20509046	-2.973	-2.89523	-1.99033	7.85857
Scf_2L	412	4155818	2.14454	-2.8383	2.87463	7.85746
Scf_2R	1957	20757430	2.93772	2.22926	2.69036	7.85734
Scf_2L	1706	16232563	-2.8331	2.63866	-2.38526	7.85702
Scf_2L	1290	12327322	3.19464	2.79014	1.87209	7.85687
Scf_2R	821	9136648	-2.36397	3.05954	2.43259	7.85609
Scf_3L	447	3864344	3.10104	2.30196	2.45183	7.85483
Scf_2R	655	7567967	1.74519	2.41673	3.68956	7.85148
Scf_3L	1106	9103988	3.44134	2.83727	-1.57214	7.85075
Scf_2L	1872	18147106	-3.35516	-2.00914	2.48577	7.85007
Scf_X	930	11537351	-2.49152	2.09771	3.25802	7.84725
Scf_3R	146	1843018	-2.31115	2.99434	-2.5414	7.8469
Scf_3R	1349	12713959	-3.07408	-2.48528	2.28677	7.84613
Scf_3L	581	5164235	2.44432	3.30826	-2.0933	7.84588
Scf_3R	1791	16322715	2.67253	3.0214	2.15142	7.84535
Scf_2L	227	2300782	-2.46285	2.51002	-2.87233	7.8452
Scf_2L	1074	10459919	2.65572	2.98224	2.20708	7.84504
Scf_2R	161	1788629	-3.7019	-1.41713	-2.72595	7.84498
Scf_2L	1663	15932695	4.3284	1.42909	2.0868	7.84428
Scf_3L	1338	10823598	3.52466	1.49729	2.82181	7.84376
Scf_X	1273	15768462	2.29875	3.41161	2.13287	7.84324
Scf_2L	1394	13249051	2.86006	-2.62612	-2.35529	7.84147
Scf_2L	1439	13684875	-2.02057	-2.86182	2.95872	7.84112
Scf_3R	2580	24127573	2.77289	2.03112	3.03683	7.84084
Scf_3R	2797	26263968	-2.54821	-2.31619	2.97622	7.84062
Scf_X	1649	20351069	2.22165	2.97335	2.64555	7.84054
Scf_3L	60	569370	2.28325	2.88761	2.66939	7.84025
Scf_3R	336	3904261	3.31105	-2.02817	-2.49982	7.83904
Scf_X	367	5449873	3.20122	-2.65059	1.98715	7.83896
Scf_3R	2146	19622498	2.03005	3.23391	-2.57482	7.83879
Scf_2L	1120	10874540	2.8986	2.3896	2.55045	7.83865
Scf_2L	1305	12472392	-2.12652	-2.96969	-2.74198	7.83819
Scf_3L	1143	9399918	2.65711	3.17917	2.00176	7.83804
Scf_3R	1226	11425919	-2.67165	2.61269	2.55368	7.83803
Scf_2L	1162	11298376	2.17	2.36052	3.30743	7.83796
Scf_3R	1035	9818660	2.76794	2.74059	-2.32922	7.83776
Scf_3L	1214	10028005	-2.73824	2.30466	2.79433	7.83723
Scf_2R	990	10644319	-3.60511	1.87427	2.3578	7.83718
Scf_3R	2216	20128075	-1.94607	3.01335	2.87681	7.83624
Scf_3L	2728	23734550	-2.26789	-2.43903	-3.12893	7.83586
Scf_X	1572	19737767	-3.24426	-1.87352	-2.71762	7.8354
Scf_2L	190	1923315	1.99729	-2.10532	3.73249	7.8351
Scf_3L	2484	20399788	3.43014	-2.28054	2.12401	7.83469
Scf_2L	84	1200039	2.4558	-3.28949	2.08876	7.83405
Scf_3R	884	8556377	-1.92866	3.16261	2.74251	7.83377
Scf_2L	366	3728547	1.76112	2.21783	-3.85473	7.83369
Scf_3R	247	2910378	2.51094	-1.53292	3.78889	7.83276
Scf_2L	1080	10514659	-1.89514	-3.01533	2.92176	7.83222
Scf_3R	596	6248376	2.95588	2.96297	-1.9126	7.83145
Scf_2L	358	3671776	-2.05535	-2.65323	3.12276	7.83134
Scf_2R	629	7264906	3.24333	2.36982	2.21747	7.83062
Scf_3L	364	3387044	-3.78752	1.52693	-2.51455	7.829
Scf_2L	1316	12576075	-2.30592	2.84102	-2.68156	7.8285
Scf_3R	2362	21740202	-3.10297	2.65079	2.07018	7.82393
Scf_2L	213	2188162	-2.78976	2.59254	2.44149	7.8238
Scf_2L	1766	16877928	3.03061	2.06398	2.72837	7.82296
Scf_3R	1923	17529547	2.0115	-2.89406	2.91645	7.82202
Scf_3R	270	3175090	3.04707	-2.35674	2.41817	7.82198
Scf_3L	187	1743773	2.19248	2.70653	2.92283	7.82184
Scf_2L	1712	16273111	2.83288	-2.51349	2.47465	7.82103
Scf_2L	6	216733	2.73856	2.38617	-2.69555	7.82028
Scf_X	570	7809021	-2.30708	-2.23784	3.27521	7.82014
Scf_2L	797	7714029	2.51804	3.45684	-1.84505	7.81994
Scf_3L	996	8295805	-2.88606	2.48284	-2.45074	7.81964
Scf_3L	1264	10391914	2.64837	2.86771	2.30352	7.81961
Scf_3R	1929	17561202	-2.11581	-2.73162	2.97176	7.81919
Scf_2L	493	4981068	2.43982	2.02766	3.35164	7.81912
Scf_3L	1253	10310174	3.18907	2.90146	-1.72693	7.81746
Scf_3L	698	6184133	-2.04072	2.48166	3.29324	7.81562
Scf_3R	1306	12148060	-2.49181	2.34267	2.98071	7.81519
Scf_3R	1309	12206448	2.21307	-3.41087	2.19117	7.81511
Scf_3L	2725	23714173	-2.65356	-1.74449	-3.41702	7.81507
Scf_X	1199	14437812	2.34691	-3.19133	-2.2767	7.81494
Scf_X	1001	12143853	2.658	-3.01056	2.14618	7.81474
Scf_3R	162	2114253	3.13681	-2.31791	-2.35918	7.8139
Scf_3L	2255	18346018	2.93312	2.59318	2.28663	7.81293
Scf_3R	800	7789780	3.04847	1.75617	3.00724	7.81187
Scf_2L	1370	13055966	-1.84605	1.88155	4.0839	7.8115
Scf_3R	2018	18485117	-2.77582	-1.90853	-3.12693	7.81128
Scf_3L	1604	13318050	2.53452	2.93755	-2.33905	7.81112
Scf_3L	240	2221240	2.53673	-2.48685	2.78739	7.81097
Scf_3L	1726	14094324	2.88358	-2.09828	2.82842	7.81028
Scf_3R	864	8380805	3.56403	1.68928	2.55664	7.80995
Scf_X	489	6929862	3.05255	1.95924	2.79788	7.80966
Scf_3L	2498	20519412	-3.17925	2.31453	-2.31548	7.80926
Scf_2L	1168	11388747	2.84263	2.83257	2.13381	7.80901
Scf_3R	592	6217811	3.01712	2.63023	2.16039	7.80774
Scf_3R	2382	21869930	2.50331	2.08377	3.21943	7.80651
Scf_2R	1986	21272975	2.02215	2.33948	-3.44479	7.80642
Scf_2L	2115	20399232	1.99336	2.1043	3.70738	7.80505
Scf_3L	754	6631894	-2.30631	2.86212	2.63586	7.8043
Scf_2L	1708	16245309	3.57524	1.8799	2.34798	7.80312
Scf_3L	1006	8398858	-3.11414	-1.97557	-2.71287	7.80258
Scf_3L	755	6641546	1.57737	4.61001	1.61517	7.80255
Scf_2L	1694	16129725	3.22774	-2.78474	-1.78998	7.80245
Scf_3L	1534	12599765	3.44371	2.30346	-2.05484	7.80201
Scf_2L	2191	21404477	-3.24188	-2.82626	1.73299	7.80113
Scf_2L	607	6236737	2.47945	2.62719	2.69428	7.80092
Scf_2R	1277	13296747	-1.94963	3.08626	2.76378	7.79967
Scf_3R	804	7813629	-2.61439	3.27278	1.91209	7.79927
Scf_2R	569	6787999	2.81243	-2.72339	-2.26332	7.79914
Scf_2R	940	10253283	3.23863	-2.05781	-2.5027	7.79914
Scf_3L	2449	20056178	2.63429	2.92063	2.24206	7.79698
Scf_2R	555	6584992	3.39759	2.20735	2.19182	7.79676
Scf_X	1010	12210890	-2.67526	-2.6154	2.50599	7.79666
Scf_X	1419	17541348	-2.86482	2.49894	2.43282	7.79658
Scf_X	260	4400211	2.50906	3.03047	-2.2565	7.79603
Scf_X	1308	16174430	2.88528	3.02628	1.88418	7.79574
Scf_3L	2651	22417952	2.75235	-2.32488	-2.71784	7.79507
Scf_2L	1465	13877430	-2.7036	2.48748	2.60397	7.79505
Scf_2L	352	3639931	2.46117	-3.19102	2.14076	7.79294
Scf_3R	1079	10229358	2.34412	3.23055	-2.21759	7.79226
Scf_2R	97	1029225	3.70458	-2.43684	-1.65078	7.79221
Scf_X	490	6937704	-2.44162	-2.83489	2.51515	7.79166
Scf_2L	1620	15581047	-2.11778	3.67067	-2.00306	7.79152
Scf_3L	743	6575405	2.04646	-3.13675	2.60806	7.79128
Scf_3L	1119	9193701	2.46081	-2.60007	2.72869	7.78957
Scf_2L	2308	23119122	-2.56717	-2.34975	-2.87086	7.78778
Scf_2R	222	2488890	3.27532	2.49743	2.01417	7.78693
Scf_X	298	4759041	2.64562	-3.23492	1.90616	7.78669
Scf_X	931	11560963	-2.68628	2.49863	2.6014	7.78632
Scf_2R	58	702725	-2.04791	-3.2071	-2.53128	7.78629
Scf_3L	1735	14135414	2.87237	-1.8254	3.08822	7.78599
Scf_2R	1773	18271723	-2.7019	-2.40733	-2.67547	7.78471
Scf_3R	619	6457213	2.86472	2.16851	2.75102	7.78425
Scf_2L	1473	13942747	2.18424	2.51286	3.08592	7.78302
Scf_3R	449	5110864	3.23522	-2.51211	2.03549	7.78282
Scf_3R	2218	20150771	-2.77611	-3.02294	-1.98326	7.78231
Scf_3R	1535	14561170	-2.15423	3.92721	1.7008	7.78224
Scf_3L	2607	21981416	2.3374	3.65558	1.78881	7.78178
Scf_3L	459	4084139	-2.1361	-3.00944	2.63536	7.7809
Scf_X	1399	17235991	2.8695	-2.68451	2.2261	7.78012
Scf_2L	1273	12181452	3.37066	2.48321	1.92593	7.7798
Scf_X	110	2576027	-2.01393	2.3906	3.37518	7.77971
Scf_2R	1463	15156624	1.94546	-3.52574	2.30791	7.77911
Scf_3L	590	5208716	-2.55754	2.56273	2.65874	7.77901
Scf_X	810	10146086	-4.08016	-1.73677	1.96167	7.7786
Scf_3R	1822	16681673	-2.11205	3.09715	2.56892	7.77812
Scf_3R	99	1174960	3.74186	-1.92886	-2.10733	7.77805
Scf_2R	586	6951188	-2.20363	3.58601	1.98791	7.77755
Scf_2R	986	10627512	1.67972	2.59172	3.5059	7.77734
Scf_3R	1217	11360520	-2.28136	3.61584	-1.88011	7.7773
Scf_2R	1385	14274708	-1.83967	2.06591	3.87103	7.77661
Scf_3R	1737	16033282	-3.04735	2.14416	-2.58504	7.77655
Scf_3R	1070	10111250	2.21419	2.58818	2.97358	7.77595
Scf_3R	887	8597459	3.92247	1.85494	1.99812	7.77553
Scf_3R	1379	13071540	2.89595	2.41321	2.46588	7.77504
Scf_2R	1868	19342762	2.87281	-1.72443	3.17595	7.7732
Scf_X	320	4922218	2.76932	3.36002	1.64346	7.7728
Scf_3R	253	2929575	-2.30475	2.87813	2.58985	7.77273
Scf_2R	134	1441434	-1.95255	2.38932	3.43052	7.77238
Scf_3R	1861	17069272	-2.27935	-2.82827	2.66474	7.77235
Scf_2R	637	7361595	-2.76038	-2.27818	-2.73296	7.77152
Scf_3R	510	5613186	2.40612	2.63439	2.73088	7.77138
Scf_X	292	4721390	2.7845	1.67917	-3.30745	7.77112
Scf_3R	526	5756682	-3.14744	2.46095	-2.16163	7.77003
Scf_2R	1803	18612275	-2.8749	2.49668	-2.39775	7.76934
Scf_3R	1783	16283874	2.62783	-2.18864	-2.95284	7.76931
Scf_2R	750	8323572	-3.54084	-2.17659	-2.05127	7.7687
Scf_3R	276	3252983	-1.96577	3.39422	-2.40812	7.76811
Scf_3L	42	476514	-2.63309	-2.39113	2.74361	7.76783
Scf_2R	192	2110616	-2.8218	-2.59015	-2.35585	7.76779
Scf_2R	681	7787121	2.87611	2.37493	2.51611	7.76715
Scf_2L	391	3927379	-2.60501	-3.66033	1.50137	7.76671
Scf_X	1300	16074256	-2.89681	2.41672	2.45278	7.76631
Scf_X	1266	15669935	2.3087	-2.13589	3.32147	7.76606
Scf_3R	551	5900269	2.56732	3.17956	2.0184	7.76528
Scf_3L	1992	16259272	2.18866	-3.17214	2.40436	7.76516
Scf_3R	1974	17925980	2.58603	2.52513	2.65371	7.76488
Scf_3L	151	1436958	-2.65171	2.81563	2.29715	7.7645
Scf_2R	818	9121935	-3.00675	2.0302	-2.72755	7.7645
Scf_3R	1	12160	2.88626	-2.11107	-2.76703	7.76437
Scf_3L	1093	8979374	2.3903	3.32788	2.04617	7.76435
Scf_3L	2605	21930854	3.15941	2.49576	2.10889	7.76406
Scf_2L	914	8815470	-2.26841	-3.10718	2.38822	7.76381
Scf_3R	1206	11307180	4.01074	1.57595	2.17706	7.76374
Scf_2R	1761	18174693	2.74253	2.80157	2.2196	7.76369
Scf_3L	714	6326971	2.2953	-3.83175	1.63651	7.76356
Scf_3L	1167	9583800	-2.0927	2.78917	2.88164	7.7635
Scf_3L	2714	23541734	-2.61126	-2.02227	-3.12985	7.76338
Scf_2L	1755	16726130	1.99821	3.14347	2.62156	7.76324
Scf_3R	1004	9632098	2.13978	2.69898	2.92421	7.76297
Scf_2L	844	8172275	2.57213	-1.9419	3.24851	7.76254
Scf_2L	1296	12375507	2.43684	-2.2605	-3.0648	7.76214
Scf_3R	1827	16723787	2.81183	-2.37771	2.57204	7.76157
Scf_2R	1717	17759792	-2.4185	-2.4307	2.91191	7.7611
Scf_3R	1297	12068174	-2.10947	3.08539	2.5659	7.76076
Scf_3L	0	2899	2.59426	1.80968	3.35636	7.7603
Scf_2L	245	2452423	2.40205	-2.15422	3.20388	7.76015
Scf_3R	21	329829	3.35196	2.16663	2.24052	7.75911
Scf_3R	2563	23942837	-1.91987	3.53105	2.30736	7.75828
Scf_2L	1865	18097115	-2.30272	3.19822	2.25664	7.75759
Scf_2L	885	8606094	-2.9896	2.69324	-2.07339	7.75623
Scf_2L	116	1446582	2.78599	-2.16355	-2.80651	7.75605
Scf_3L	1118	9193352	-2.43385	2.63904	-2.68313	7.75601
Scf_2R	630	7275643	2.04923	-1.78152	-3.9246	7.75534
Scf_2L	1233	11882857	-3.14955	-2.09262	2.51168	7.75384
Scf_2R	1908	20021217	2.89824	2.7623	2.09326	7.7538
Scf_2L	1509	14297128	2.24044	2.94192	2.57055	7.7529
Scf_2R	900	9913172	1.89891	3.61743	-2.23425	7.75059
Scf_X	1052	12741750	-2.18854	-2.34666	3.21482	7.75002
Scf_3L	317	2822182	-3.60238	1.96819	-2.17858	7.74915
Scf_X	151	2994131	2.75338	3.00875	1.98697	7.74909
Scf_3L	651	5691607	2.81682	1.52623	3.40583	7.74887
Scf_3L	122	1116839	2.26467	2.76602	2.71752	7.74821
Scf_3L	529	4734528	-2.75705	-2.83724	2.15372	7.74801
Scf_3R	51	699259	-1.99955	-2.38262	3.36542	7.74758
Scf_2L	1860	18054638	2.56632	2.85509	2.32593	7.74733
Scf_3R	2308	21201963	1.75442	-2.3483	-3.64454	7.74726
Scf_3L	1321	10671596	1.91539	2.92755	2.90365	7.74659
Scf_2R	1640	16947236	-2.27785	2.75822	-2.71041	7.74649
Scf_2L	1360	13007095	2.05499	-2.85086	2.84032	7.74616
Scf_3R	1771	16223734	-2.04798	-4.12409	-1.57387	7.74594
Scf_3L	211	1920476	3.56938	2.22811	1.94704	7.74454
Scf_2R	61	719115	-2.43848	-2.61256	-2.69188	7.74291
Scf_2L	1626	15690200	3.55295	-1.73684	-2.45294	7.74273
Scf_X	845	10596621	-2.47607	-2.48746	-2.77914	7.74266
Scf_2R	903	9947529	-3.45697	2.68253	1.60253	7.74202
Scf_3R	2385	21896349	2.03916	3.43032	2.27224	7.74172
Scf_X	406	5948571	1.75227	4.13682	1.85136	7.74046
Scf_3L	1068	8817814	1.85626	2.71264	-3.17139	7.7403
Scf_X	420	6102761	-3.71533	2.02052	-2.00443	7.74028
Scf_2R	992	10647599	2.62792	2.53389	2.5784	7.74021
Scf_3L	323	2882002	-2.57165	-2.54656	-2.62137	7.73957
Scf_2R	1047	11151564	-3.98267	1.47762	-2.27894	7.73922
Scf_2L	193	1956249	2.30743	2.4805	2.94923	7.73716
Scf_2L	1202	11736473	-2.24499	2.44666	3.04468	7.73633
Scf_2L	406	4066302	-3.22796	-2.452	2.05621	7.73617
Scf_3L	470	4184311	2.59636	-2.73595	-2.4038	7.73612
Scf_2L	519	5207940	2.54616	2.90497	2.28444	7.73557
Scf_2L	685	6955867	2.2305	2.86306	-2.64168	7.73525
Scf_3R	999	9609617	-3.59864	1.86345	2.2719	7.73399
Scf_2R	1704	17573134	-2.90755	2.4773	2.34885	7.73369
Scf_2L	1931	18593424	3.37975	2.40618	1.94769	7.73362
Scf_2L	2263	22343248	-2.1884	-2.95245	2.59274	7.7336
Scf_3R	1653	15380280	2.72406	1.78724	3.22148	7.73278
Scf_2L	568	5721723	-2.22998	2.39122	3.11088	7.73208
Scf_3L	2598	21859674	2.21189	2.25698	3.26169	7.73056
Scf_2L	125	1511597	2.58481	2.41758	2.72813	7.73052
Scf_3L	856	7381422	3.03301	-1.84208	-2.8546	7.72969
Scf_2L	1213	11786596	1.82703	3.68189	-2.22048	7.7294
Scf_2L	2028	19433795	3.13343	1.65837	2.9372	7.729
Scf_2L	1542	14599698	2.5224	2.29491	2.91154	7.72885
Scf_3R	2814	26569519	2.99711	2.36301	-2.36862	7.72874
Scf_2L	1692	16126598	-2.88553	-2.0979	-2.74524	7.72866
Scf_2L	77	1144477	2.5113	2.86959	2.34672	7.72761
Scf_2L	1689	16100838	-2.12858	-2.49058	3.10844	7.7276
Scf_3L	1934	15759889	-2.39396	2.99621	-2.33687	7.72705
Scf_2L	1522	14457859	-2.95203	2.33026	2.44473	7.72702
Scf_3R	20	309024	2.44725	2.38169	2.89756	7.7265
Scf_3L	1103	9074635	2.5955	1.99095	3.14003	7.72648
Scf_2L	1618	15537988	-2.88702	2.11394	2.72319	7.72414
Scf_3R	1024	9766515	3.12212	1.96704	2.6339	7.72305
Scf_X	808	10128800	2.63711	2.44406	2.64178	7.72295
Scf_2R	1981	21148412	2.49372	-2.84907	2.38014	7.72293
Scf_3R	839	8185074	-1.57746	2.56172	3.58355	7.72273
Scf_2L	2137	20650464	2.25143	2.87945	2.59063	7.72151
Scf_3L	2049	16689972	2.54265	2.50274	2.67577	7.72115
Scf_X	1064	12832547	1.69497	2.80198	3.22401	7.72096
Scf_3R	1220	11375738	-2.40958	-2.51657	2.79479	7.72094
Scf_2L	1447	13759083	-2.11817	-3.38362	-2.21835	7.72014
Scf_2R	121	1339907	-2.3494	-2.56282	-2.80718	7.7194
Scf_2R	1466	15172917	2.15013	3.00983	-2.55922	7.71918
Scf_3L	805	6995765	2.76965	-1.95432	2.99439	7.71835
Scf_3L	1402	11309772	3.33149	-2.2132	-2.17337	7.71806
Scf_2R	14	289453	2.52247	1.94218	3.25316	7.71781
Scf_3R	436	5007901	3.07964	2.38496	2.25273	7.71733
Scf_3R	503	5533280	-2.04105	2.43399	3.24199	7.71703
Scf_3L	777	6754444	-2.44512	-2.43474	-2.83685	7.7167
Scf_2R	625	7240298	-3.18352	-2.16436	-2.36778	7.71567
Scf_3L	1342	10866424	-2.62941	1.99741	3.08851	7.71533
Scf_X	488	6909299	-2.9579	2.35732	2.39927	7.71449
Scf_3R	1775	16241876	-2.38447	2.56207	2.76732	7.71387
Scf_3L	1626	13555280	-1.6359	-3.22802	-2.84995	7.71387
Scf_3R	1372	12973996	2.24552	-3.48873	1.97942	7.71367
Scf_3R	1332	12496571	-2.6466	2.31769	2.7488	7.7131
Scf_3L	469	4162567	2.59653	2.33898	2.77651	7.71202
Scf_3L	1804	14646292	2.33331	2.75789	-2.61934	7.71053
Scf_3L	475	4236601	2.24049	3.48205	1.98763	7.71017
Scf_X	1000	12134108	-2.14791	-2.668	2.89424	7.71014
Scf_3L	36	447933	3.29177	-1.87621	-2.54068	7.70866
Scf_3L	1712	13993767	2.55135	3.4	1.75723	7.70858
Scf_3L	1742	14176204	-3.08962	2.64584	1.97239	7.70785
Scf_3R	1557	14763663	-2.84471	-2.73317	2.12877	7.70664
Scf_3R	1631	15239818	-3.60151	2.00581	-2.09856	7.70588
Scf_X	1021	12340065	-2.74881	-2.51251	2.44433	7.70565
Scf_3R	2587	24174374	3.43395	-2.21995	2.05133	7.70523
Scf_X	1160	13997155	3.34627	2.69126	1.66748	7.705
Scf_3R	1453	13755232	1.93676	-2.34783	-3.4198	7.70438
Scf_2R	1303	13480223	-1.9012	3.32093	-2.48187	7.704
Scf_X	1034	12483469	2.81486	-2.38537	-2.50268	7.70292
Scf_3R	2593	24229788	2.31027	1.83312	3.55939	7.70278
Scf_3R	435	4995705	3.14681	2.36787	2.18787	7.70255
Scf_3L	436	3752714	-1.95965	1.88135	-3.86082	7.70183
Scf_2R	165	1881178	-2.69609	-1.75833	-3.24684	7.70126
Scf_3R	1073	10131929	2.26082	-2.92183	-2.51822	7.70086
Scf_3R	323	3836008	2.747	2.67875	2.27233	7.69808
Scf_2L	2267	22399237	3.31091	-1.70516	2.68168	7.69775
Scf_3L	1107	9112954	-2.30269	2.47191	2.92303	7.69763
Scf_3R	2736	25626286	2.77349	2.02771	-2.89548	7.69669
Scf_2R	1856	19243389	-3.10644	-2.01821	-2.57169	7.69634
Scf_3L	309	2754538	2.99693	-2.45007	-2.24926	7.69626
Scf_3R	472	5216477	-1.85914	3.27242	2.56469	7.69624
Scf_2R	16	316747	3.08299	-2.32242	2.28898	7.69439
Scf_2L	1037	10013567	-2.51922	2.52666	2.64833	7.6942
Scf_X	1455	18106171	3.08909	-1.98226	2.62218	7.69352
Scf_2L	2091	20190300	2.73773	3.31145	-1.64342	7.6926
Scf_2R	1578	16106643	-1.83302	3.71016	2.1491	7.69228
Scf_X	475	6757355	3.10754	1.65583	2.92779	7.69116
Scf_3L	1788	14468516	3.01237	-2.67512	2.00276	7.69024
Scf_2L	1907	18378218	2.2968	2.66902	2.7244	7.69021
Scf_2R	418	4888013	2.59865	2.98006	-2.11037	7.68908
Scf_2L	1351	12875600	-1.98963	2.60868	3.09065	7.68896
Scf_2L	1111	10818800	3.25083	2.46176	1.97621	7.6888
Scf_2L	1121	10880905	2.40393	2.57288	2.71183	7.68864
Scf_3L	2108	17187804	1.99322	2.64189	3.05339	7.6885
Scf_3L	1740	14165019	-1.41326	3.52932	-2.7457	7.68828
Scf_2R	1623	16781442	-1.53672	3.54713	2.6038	7.68764
Scf_2R	318	3546430	-2.10773	2.27689	3.30216	7.68678
Scf_X	1556	19469935	-3.53041	-2.13745	-2.01776	7.68562
Scf_2R	410	4771510	1.91794	3.33271	2.43432	7.68497
Scf_X	441	6387067	2.64215	2.23112	-2.81156	7.68483
Scf_2R	283	3243443	2.04	-3.37835	-2.26511	7.68346
Scf_X	518	7277523	3.05723	-2.0949	2.53114	7.68327
Scf_3L	1635	13609420	1.76421	-3.32773	-2.59129	7.68324
Scf_3L	584	5176537	3.1012	1.86501	-2.71688	7.68309
Scf_2L	51	813373	-3.16102	-1.97893	2.54304	7.68299
Scf_2L	161	1695193	3.54471	2.13081	-2.00717	7.68269
Scf_3L	298	2698542	-3.05814	-2.59809	2.02615	7.68239
Scf_2R	1244	13009513	3.53144	-1.7487	2.40167	7.68181
Scf_3L	2208	17956311	3.07775	-2.93072	1.67253	7.681
Scf_3L	13	263420	-1.88357	-3.33581	-2.46033	7.67971
Scf_3R	471	5212460	3.06539	2.39198	-2.22183	7.6792
Scf_3L	2183	17745013	3.44372	-2.08823	2.14634	7.6783
Scf_3L	1625	13550998	-3.22092	2.09084	2.36617	7.67792
Scf_X	1619	20236740	-1.82287	-3.30853	2.54649	7.67789
Scf_3L	2505	20597393	-2.08881	2.35589	-3.23279	7.67749
Scf_2L	2344	23526316	2.99	-1.49171	3.1954	7.67711
Scf_3L	1706	13983980	-2.33094	2.77958	-2.56645	7.67697
Scf_X	1042	12588672	2.42484	2.61405	-2.63796	7.67685
Scf_X	1181	14235620	2.66138	2.89857	-2.11641	7.67636
Scf_3R	204	2511578	-2.18487	-2.69732	2.79411	7.67631
Scf_2L	1075	10475833	2.84034	2.52284	2.31296	7.67614
Scf_X	248	4252437	-2.40581	2.61238	2.65752	7.6757
Scf_3R	1508	14236347	-1.81075	3.23154	2.6334	7.67569
Scf_2L	1831	17821842	4.18746	1.66039	-1.82783	7.67568
Scf_3R	13	220731	-2.79006	-1.83117	3.05353	7.67476
Scf_3R	948	9147218	2.79793	-2.67464	-2.20218	7.67474
Scf_X	999	12129104	2.4512	2.64645	2.57625	7.67391
Scf_2R	1071	11329405	-3.95884	2.01916	1.69568	7.67368
Scf_3R	623	6484115	-2.25786	2.85743	-2.55785	7.67314
Scf_3R	63	855476	2.56178	-2.12068	2.99031	7.67277
Scf_X	513	7215177	-2.27574	2.39662	-2.99975	7.6721
Scf_2L	684	6949138	2.605	2.83172	2.23524	7.67195
Scf_3L	2303	18736707	3.01874	1.71816	2.935	7.6719
Scf_3R	1262	11722253	1.95957	-3.11818	2.59342	7.67117
Scf_2R	434	5032751	3.06939	2.95589	-1.64581	7.67109
Scf_3R	1068	10104055	2.96507	2.75533	1.95031	7.67071
Scf_2L	1763	16846017	2.41186	2.99968	2.25912	7.67066
Scf_2L	1598	15263279	-2.98905	-2.50557	-2.17532	7.66993
Scf_3R	2169	19843549	2.42527	2.39595	2.84817	7.66939
Scf_X	1684	20738868	-2.71194	-2.66147	-2.29542	7.66883
Scf_2R	1778	18306859	2.31292	2.63472	-2.72028	7.66792
Scf_3L	2662	22854918	-2.9487	-2.61895	-2.0994	7.66705
Scf_2R	367	4183968	2.50249	2.86892	2.29491	7.66632
Scf_3R	1246	11578005	2.98883	2.28345	2.39394	7.66622
Scf_2R	315	3508581	2.58513	-2.66023	2.42004	7.66541
Scf_3R	488	5377931	2.95461	-2.79354	-1.91703	7.66518
Scf_3R	2720	25495712	2.8391	2.77622	2.04983	7.66515
Scf_3R	380	4352795	2.26539	2.63272	-2.76692	7.66502
Scf_3R	14	241399	2.79729	3.39893	1.46816	7.66438
Scf_2L	1398	13279253	2.61496	-2.18353	-2.86587	7.66435
Scf_3R	1228	11430208	2.64532	-2.58844	-2.43054	7.66429
Scf_3R	1223	11399499	3.06157	-2.4939	2.10834	7.66381
Scf_3L	425	3684259	-2.95326	2.14972	2.56052	7.66351
Scf_2R	1513	15575986	-2.84178	-2.40696	2.41348	7.66222
Scf_3L	1942	15796423	2.50601	-2.68591	2.46929	7.66121
Scf_3R	934	9032498	-2.42776	-3.08944	2.14332	7.66051
Scf_2L	2078	20052268	3.2706	-1.76693	2.6223	7.65983
Scf_X	1609	20182394	-2.34737	-2.8649	-2.44614	7.6584
Scf_3L	819	7064163	2.3223	2.55782	2.77714	7.65726
Scf_3R	1619	15146587	2.18815	3.35806	-2.1108	7.65701
Scf_3R	2082	19095505	-2.88527	-2.51704	2.25377	7.65609
Scf_X	718	9243417	1.94697	3.2461	-2.46298	7.65606
Scf_2L	2019	19351582	-2.28973	-2.7798	2.58635	7.65588
Scf_3R	858	8346370	3.1351	2.01259	2.50619	7.65388
Scf_2R	1082	11431577	3.14847	-2.02686	-2.47784	7.65317
Scf_2R	1118	11794127	2.57223	2.28536	2.79527	7.65285
Scf_3R	1470	13905254	3.33419	2.21258	2.10506	7.65183
Scf_X	781	9888835	-1.80509	1.96418	-3.88238	7.65166
Scf_2L	344	3536593	2.30757	3.47914	1.86312	7.64984
Scf_3R	1391	13205190	2.22594	-3.21181	-2.21198	7.64974
Scf_3L	559	5079144	2.29415	-2.66181	2.69338	7.64935
Scf_2L	1401	13306946	-2.93492	-2.22719	-2.48687	7.64897
Scf_X	285	4660650	2.9523	2.57899	2.11723	7.64853
Scf_2L	954	9141960	-2.30708	2.63449	-2.70617	7.64774
Scf_2L	660	6774190	-2.38875	-2.30143	2.95749	7.64768
Scf_3L	1040	8568775	3.55641	-1.95776	2.13337	7.64755
Scf_2L	281	2840991	-2.15613	2.67549	2.81581	7.64743
Scf_3L	175	1606468	2.37829	-2.05623	3.2121	7.64662
Scf_2L	1787	17073774	-2.23307	-2.19216	-3.22071	7.64594
Scf_2R	209	2270119	-3.10151	-2.30294	-2.2414	7.64585
Scf_3R	2372	21806871	-1.85283	2.71183	-3.08068	7.64534
Scf_3L	1895	15427667	1.96498	2.72677	2.95336	7.64511
Scf_3R	1813	16567496	2.85266	2.52232	-2.26926	7.64424
Scf_2R	1896	19762231	2.12944	-2.49644	3.0175	7.64338
Scf_2R	689	7844523	2.14303	3.01964	2.47993	7.64259
Scf_2L	2325	23348468	-2.98714	-1.85819	-2.7967	7.64203
Scf_X	1602	20099335	-2.64536	2.24944	2.74697	7.64177
Scf_3R	18	287011	2.87195	2.47974	-2.28997	7.64166
Scf_2L	1198	11635813	3.22006	-2.19446	2.22665	7.64117
Scf_2R	1692	17445879	-2.67184	2.992	1.97721	7.64105
Scf_3L	408	3608737	-3.59497	-1.87326	2.1718	7.64003
Scf_2L	776	7618035	-2.10131	2.56455	-2.97331	7.63916
Scf_3R	1970	17876940	3.1537	2.31463	2.1706	7.63893
Scf_2R	1985	21238313	-2.20673	3.74043	1.69138	7.63854
Scf_3L	2138	17506282	-2.85009	-2.09099	2.69745	7.63853
Scf_X	1351	16714169	1.86842	-2.79599	2.97376	7.63817
Scf_2R	487	5745660	-2.0208	-2.62096	2.99529	7.63704
Scf_3L	1739	14161694	-2.00402	3.00955	-2.62303	7.6366
Scf_3L	1663	13783831	2.73972	3.03401	1.86265	7.63639
Scf_X	1586	19902545	-2.92067	2.88029	1.83526	7.63622
Scf_3L	1642	13654115	3.08563	-1.91551	2.63462	7.63575
Scf_2R	756	8386994	-3.1239	-1.93065	2.58086	7.6354
Scf_3R	288	3510809	2.80581	2.00798	2.8212	7.635
Scf_3R	2848	27111851	-2.02851	-2.0292	-3.57726	7.63498
Scf_3L	2164	17593677	2.75639	2.14161	-2.73692	7.63492
Scf_2R	1699	17540219	2.05182	-2.3165	3.26609	7.63441
Scf_3R	149	1915777	2.29591	1.83041	3.50802	7.63435
Scf_3R	2621	24491602	-1.80643	-2.34291	3.48375	7.63309
Scf_2R	543	6335563	4.02161	2.15337	1.4581	7.63307
Scf_X	1487	18583885	2.31714	3.18028	2.13552	7.63293
Scf_3L	2403	19649231	-2.64094	-2.67	2.32187	7.63281
Scf_3R	1525	14447416	3.10978	2.78885	-1.73389	7.63252
Scf_2L	1639	15831474	-1.93131	-2.42253	3.27866	7.6325
Scf_2L	960	9177565	-2.66882	1.71528	3.24821	7.6323
Scf_2L	2185	21298595	-2.34818	-3.13544	-2.14838	7.63201
Scf_2R	981	10555640	3.20645	-1.86379	2.56166	7.6319
Scf_2L	1822	17728066	4.04795	-1.67522	1.90776	7.63093
Scf_3L	1316	10619972	2.86519	-2.63471	2.12886	7.62877
Scf_3R	83	1022390	3.05046	-2.23403	-2.34372	7.62821
Scf_3R	2458	22822411	-2.10252	2.74106	2.78458	7.62815
Scf_3R	1817	16624192	3.19655	-1.92892	2.50249	7.62797
Scf_2L	717	7165944	-2.33651	-2.70095	2.58984	7.6273
Scf_3R	2711	25451907	-1.74946	-3.32101	2.55606	7.62654
Scf_3L	1298	10552024	-2.31195	-2.68315	2.63115	7.62624
Scf_3R	775	7625440	-1.56892	-3.07198	2.98491	7.62581
Scf_3R	2228	20288883	2.48137	2.57659	-2.56736	7.62532
Scf_3R	1370	12970917	-1.84759	-3.34158	2.43578	7.62494
Scf_2R	225	2518243	-2.51053	-3.13684	1.97737	7.62474
Scf_2L	2058	19842509	-3.20515	2.07958	2.33804	7.62278
Scf_3R	1680	15701296	-2.21941	-2.93365	-2.46971	7.62277
Scf_3R	1734	16024220	3.12503	-1.84102	2.65649	7.62254
Scf_3R	1723	15981271	2.12168	2.76237	2.7372	7.62126
Scf_2R	491	5766966	-2.21251	3.2912	2.11653	7.62024
Scf_X	238	4115433	-1.73445	3.33838	-2.54701	7.61984
Scf_2L	1744	16522422	2.10629	2.96513	2.54808	7.61949
Scf_2R	374	4335539	2.43683	2.46812	2.71433	7.61929
Scf_3R	1881	17264320	2.3058	3.59493	1.71806	7.61879
Scf_X	300	4780601	-2.60866	-1.71878	3.29088	7.61832
Scf_3R	1171	10945240	2.81476	-1.64178	3.16177	7.61831
Scf_3L	116	1072431	-2.59209	-2.31746	2.70872	7.61826
Scf_2R	482	5694508	-2.4719	-3.09751	2.04861	7.61802
Scf_X	554	7684288	2.38415	3.22546	2.00833	7.61794
Scf_X	1230	15086247	2.20867	3.09622	2.31214	7.61703
Scf_3L	1687	13904950	-2.0767	2.5999	2.94041	7.61701
Scf_3L	975	8134851	2.27991	-3.09508	2.24197	7.61696
Scf_2R	892	9865974	2.82669	-3.00642	-1.78372	7.61683
Scf_3R	2640	24654928	3.27056	2.20336	2.1427	7.61662
Scf_3R	1541	14632030	-2.40708	-1.97151	3.23748	7.61608
Scf_2R	325	3702716	2.18047	1.91826	-3.516	7.61473
Scf_2R	862	9596057	-2.13508	-3.01552	-2.462	7.6126
Scf_2L	1827	17776712	-1.93063	3.21957	-2.46206	7.61226
Scf_X	336	5094596	2.69171	-3.27392	-1.64566	7.61129
Scf_2L	1718	16301191	2.92191	2.76058	1.9285	7.611
Scf_3R	179	2191535	2.26933	2.4717	2.869	7.61003
Scf_3R	1605	15064373	-2.22181	2.61446	2.77328	7.60954
Scf_3L	1473	12071611	3.02567	2.43892	2.1437	7.60829
Scf_3R	970	9327643	-2.16026	2.5452	2.9026	7.60807
Scf_3R	482	5308430	3.20906	-1.90274	2.49617	7.60797
Scf_X	178	3309003	1.49878	2.60075	3.50798	7.60751
Scf_2L	762	7498150	-2.49943	-2.8637	2.24389	7.60702
Scf_2L	859	8342660	-2.7891	-2.78806	2.02954	7.60671
Scf_3L	1419	11516169	-2.42126	3.062	-2.12309	7.60635
Scf_3R	504	5543663	2.23362	2.58932	2.78239	7.60534
Scf_2L	1889	18267132	3.07561	-2.4787	-2.05069	7.605
Scf_3R	1655	15399576	2.71054	-2.70501	2.18836	7.60391
Scf_3L	1428	11661902	1.6179	-2.12079	3.86476	7.60345
Scf_2R	1139	12029569	-2.29674	2.4752	-2.83085	7.60279
Scf_2L	386	3899928	-2.87643	2.57417	2.15167	7.60227
Scf_3L	1543	12715773	2.46726	-2.37349	2.76132	7.60208
Scf_3R	3	64076	-2.51745	-2.68418	-2.40005	7.60167
Scf_X	678	8735515	2.48571	2.70724	2.40867	7.60161
Scf_3R	2283	20968412	-2.31814	2.1233	3.15993	7.60137
Scf_3L	910	7699446	3.36061	2.64829	1.59178	7.60068
Scf_2L	636	6523716	3.09367	2.30936	-2.19699	7.60001
Scf_3L	103	978020	-3.40351	2.06999	2.12644	7.59993
Scf_2L	166	1743747	2.78755	2.7307	-2.08151	7.59975
Scf_3R	909	8814993	3.33457	2.22174	2.04318	7.59949
Scf_3R	10	154633	-2.43276	-2.65221	-2.51442	7.59939
Scf_2R	1291	13392524	-3.04527	2.32364	2.22931	7.59822
Scf_2L	857	8324474	2.04242	3.59141	1.96432	7.59815
Scf_2L	456	4679398	1.9465	3.08559	2.56551	7.5976
Scf_2R	1490	15413894	-2.9577	2.88937	-1.74993	7.597
Scf_3L	1394	11278745	2.39422	2.28785	2.91478	7.59685
Scf_3L	791	6854212	3.07432	-1.88489	-2.63738	7.59659
Scf_3R	2114	19366087	-2.32513	2.91516	2.35622	7.59652
Scf_3R	2353	21634907	3.37634	-2.10678	2.11322	7.59634
Scf_X	1625	20269488	2.5537	2.53707	-2.5054	7.59617
Scf_2L	596	6064749	-2.9948	-2.54867	-2.05253	7.596
Scf_2R	1427	14767093	1.93977	-3.02823	2.62728	7.59528
Scf_X	1567	19645941	2.10628	2.21559	3.27327	7.59514
Scf_3R	2112	19345852	2.21427	2.40743	-2.97338	7.59508
Scf_3R	1323	12363886	-3.28349	2.19943	2.11207	7.59499
Scf_2L	359	3678795	-2.12593	2.06743	3.40129	7.59465
Scf_3L	740	6561564	-1.6289	3.67929	-2.28587	7.59406
Scf_3R	318	3805754	-2.70654	-2.17913	-2.70808	7.59374
Scf_2R	437	5046192	2.46693	-1.74165	3.38332	7.5919
Scf_2L	1192	11575450	2.68294	1.68626	3.22268	7.59188
Scf_3R	568	6018253	3.47199	-2.10995	2.00986	7.5918
Scf_3R	2447	22681587	1.98906	2.42345	3.179	7.59151
Scf_3R	695	7082536	2.73178	2.49468	2.36473	7.59119
Scf_2R	1008	10731356	3.2123	-2.49816	1.87981	7.59027
Scf_3R	875	8467696	2.9446	2.56097	-2.08324	7.58881
Scf_3L	1682	13886413	2.67879	2.89511	2.01377	7.58767
Scf_2L	1308	12509526	-2.9683	-2.19297	2.42539	7.58666
Scf_3R	1389	13195971	2.44216	3.2653	1.87865	7.58611
Scf_3L	780	6771254	-3.21144	-2.22263	-2.15203	7.5861
Scf_3R	694	7078449	2.01584	-3.01597	2.55411	7.58592
Scf_2R	352	4032812	2.55966	-1.9801	3.04549	7.58525
Scf_3R	863	8379823	-2.37912	-2.35052	2.85498	7.58461
Scf_2R	1963	20857101	2.45558	-2.24685	2.88129	7.58371
Scf_3R	1258	11671932	3.24756	-2.16069	-2.17517	7.58342
Scf_3R	1233	11452364	2.34786	-2.10685	3.1286	7.58331
Scf_2L	577	5803948	3.04732	1.66407	2.87122	7.5826
Scf_3R	1122	10599911	4.02012	1.754	1.8082	7.58232
Scf_2L	2020	19360479	-2.51707	-2.8308	-2.23433	7.58219
Scf_3R	419	4740777	-1.81542	3.13584	2.63079	7.58206
Scf_3R	809	7848852	2.54236	2.70343	-2.33598	7.58177
Scf_2L	622	6353693	2.70289	2.67874	2.20002	7.58165
Scf_3R	2849	27124784	-2.00454	-2.59809	-2.97878	7.5814
Scf_X	1195	14430805	-2.2545	-2.92213	-2.40468	7.58131
Scf_3L	1098	9020153	2.41369	-2.21751	2.94988	7.58108
Scf_2R	1363	13977433	2.93971	2.65376	1.98651	7.57998
Scf_3L	1275	10441079	-2.77135	1.92553	-2.88275	7.57963
Scf_3R	206	2531303	-2.52076	-2.11058	2.94797	7.57931
Scf_2R	1899	19816555	1.82211	2.77806	2.97811	7.57828
Scf_3L	1278	10452722	2.1875	2.84586	2.54445	7.57782
Scf_3R	1006	9645714	2.87586	-2.41777	2.28323	7.57686
Scf_3L	887	7603920	-2.38438	2.59254	2.59984	7.57676
Scf_2R	362	4114399	1.99611	-3.38703	2.19309	7.57624
Scf_2L	1437	13674774	1.81256	2.9374	2.82628	7.57623
Scf_3R	995	9550752	-2.3239	-2.21111	3.04064	7.57565
Scf_2R	429	4994156	-2.23563	-2.883	2.45565	7.57428
Scf_2R	1145	12118229	2.7023	2.03505	2.83664	7.57399
Scf_3R	1128	10632441	2.08308	2.88141	2.60895	7.57345
Scf_3R	2294	21073828	-2.45675	2.34773	2.76835	7.57283
Scf_3L	841	7226250	2.17987	2.49172	2.90094	7.57253
Scf_2L	532	5309547	-2.38999	-2.9874	2.19498	7.57237
Scf_2R	1	9070	2.80225	2.23687	2.53311	7.57224
Scf_X	1525	19001726	-2.82727	-2.34631	2.39833	7.57191
Scf_2R	438	5057389	2.48326	-2.60511	2.48348	7.57185
Scf_3R	918	8904994	2.19681	2.30338	-3.07065	7.57085
Scf_2R	642	7421546	-2.51041	-2.96932	-2.09111	7.57084
Scf_2R	1785	18385152	2.31978	2.40201	-2.84856	7.57035
Scf_3L	1703	13970219	2.75152	2.90917	-1.90928	7.56997
Scf_3L	1347	10874476	1.95399	2.36098	3.25468	7.56965
Scf_2L	1599	15265887	-2.02075	2.16924	3.37895	7.56894
Scf_2R	321	3615598	2.97524	2.3652	2.22816	7.5686
Scf_2L	898	8715717	2.46727	2.03315	3.06774	7.56817
Scf_2L	137	1555545	2.78436	2.29634	-2.48707	7.56776
Scf_X	82	2251572	2.29904	-2.51258	2.75594	7.56755
Scf_3R	542	5869122	-2.46007	1.89132	3.21603	7.56743
Scf_2R	1343	13855560	-2.48201	1.76382	3.32145	7.56728
Scf_2R	1361	13948477	2.79452	-2.55364	-2.21879	7.56696
Scf_3L	133	1264333	-1.76744	-2.3349	3.46277	7.56511
Scf_3L	1340	10834588	2.72428	-2.18949	-2.65134	7.56511
Scf_2R	785	8692721	2.20577	2.55374	2.80544	7.56495
Scf_3R	2192	19981500	3.05509	1.46032	3.04898	7.56439
Scf_2L	625	6369145	1.88459	-3.19433	2.48533	7.56424
Scf_3L	892	7633370	2.14087	-2.30959	-3.11306	7.56351
Scf_X	1513	18827853	-2.01372	-2.86897	-2.6804	7.5631
Scf_3R	720	7289256	-3.27852	2.45015	-1.83362	7.56229
Scf_3L	2636	22312713	2.75528	2.30686	2.50006	7.5622
Scf_2L	1521	14452837	3.48399	1.73118	2.3469	7.56207
Scf_3R	1207	11308436	3.56596	1.50166	-2.49303	7.56065
Scf_2L	1584	15125504	-2.53621	3.13851	1.88592	7.56064
Scf_3R	185	2259938	-1.76879	-2.64666	-3.14516	7.56061
Scf_3R	34	555731	-2.00624	-2.731	2.82286	7.5601
Scf_3R	635	6570379	-2.51165	-2.68055	-2.36711	7.5593
Scf_3R	2813	26559796	2.79205	2.8774	1.88983	7.55928
Scf_2L	931	8920061	2.02536	3.26907	-2.2638	7.55823
Scf_2L	1107	10743588	3.16801	-1.96072	2.42898	7.55771
Scf_3R	2759	25854627	2.80064	2.76665	1.99032	7.55761
Scf_3R	1346	12687558	-2.6571	-2.66027	2.24021	7.55759
Scf_3L	2408	19700750	-2.63894	2.32237	2.59608	7.55739
Scf_3R	2246	20593433	-2.64941	2.58947	-2.31791	7.55679
Scf_2R	137	1446262	2.13541	-2.38583	-3.03534	7.55659
Scf_3R	2365	21764219	2.24171	-2.73726	-2.57752	7.55648
Scf_3R	107	1247450	-2.19266	2.98518	2.37812	7.55596
Scf_X	253	4315462	-2.61612	2.90997	-2.0289	7.55499
Scf_3R	369	4284086	2.04134	3.25603	-2.25702	7.55439
Scf_3L	419	3650536	-2.54733	2.67019	2.33663	7.55415
Scf_3L	2536	20952584	2.803	-2.64222	-2.10883	7.55404
Scf_3R	122	1407328	2.62014	-2.33864	-2.59482	7.5536
Scf_3R	2430	22452331	2.97191	-2.78334	-1.79784	7.5531
Scf_3R	1343	12620079	2.24743	-1.98759	3.31762	7.55264
Scf_2L	2024	19402331	2.23512	-2.91233	2.40456	7.55201
Scf_X	934	11609402	-1.97206	2.46556	3.11415	7.55177
Scf_2L	916	8824776	2.31316	-1.52709	-3.7113	7.55154
Scf_3R	637	6597408	-2.87662	2.13551	2.53939	7.55153
Scf_2L	1023	9724891	1.82834	-2.38119	3.34194	7.55148
Scf_2R	1453	14997990	-2.14785	-2.4123	-2.99064	7.55079
Scf_2L	938	8978039	-2.18862	2.72341	2.63818	7.55021
Scf_3R	2197	20025279	-1.90238	3.9208	1.72651	7.54969
Scf_2L	120	1482355	2.19389	-2.83744	2.51771	7.54904
Scf_X	1475	18443699	3.02796	-2.81419	1.70626	7.54841
Scf_3L	641	5616062	-1.69767	2.84404	-3.00669	7.54839
Scf_2L	2283	22811299	2.70453	1.60699	3.23628	7.5478
[truncated: 9,655 more rows]
